# Supplementary material for: Cognitive control and daily affect regulation in major depression and borderline personality disorder: protocol for an experimental ambulatory assessment study in Berlin, Germany
Source: PubMed Central journal article supplement — BMJ Open. 2018 Oct 2;8(10):e022694. doi: 10.1136/bmjopen-2018-022694 (PMC6169760; doi:10.1136/bmjopen-2018-022694), 2018-10-02
Supplement: bmjopen-2018-022694.draft_revisions.pdf [file bmjopen-2018-022694.draft_revisions.pdf]

# BMJ Open

BMJ Open is committed to open peer review. As part of this commitment we make the peer review history of every article we publish publicly available.

When an article is published we post the peer reviewers' comments and the authors' responses online. We also post the versions of the paper that were used during peer review. These are the versions that the peer review comments apply to.

The versions of the paper that follow are the versions that were submitted during the peer review process. They are not the versions of record or the final published versions. They should not be cited or distributed as the published version of this manuscript.

BMJ Open is an open access journal and the full, final, typeset and author-corrected version of record of the manuscript is available on our site with no access controls, subscription charges or pay-per-view fees (<http://bmjopen.bmj.com>).

If you have any questions on BMJ Open's open peer review process please email [info.bmjopen@bmj.com](mailto:info.bmjopen@bmj.com)

# BMJ Open

## Cognitive control and daily affect regulation in major depression and borderline personality disorder: a study protocol

|                               |                                                                                                                                                                                                                                                                                                                                       |
|-------------------------------|---------------------------------------------------------------------------------------------------------------------------------------------------------------------------------------------------------------------------------------------------------------------------------------------------------------------------------------|
| Journal:                      | <i>BMJ Open</i>                                                                                                                                                                                                                                                                                                                       |
| Manuscript ID                 | bmjopen-2018-022694                                                                                                                                                                                                                                                                                                                   |
| Article Type:                 | Protocol                                                                                                                                                                                                                                                                                                                              |
| Date Submitted by the Author: | 01-Mar-2018                                                                                                                                                                                                                                                                                                                           |
| Complete List of Authors:     | Schulze, Lars; Freie Universität Berlin, Clinical psychology and psychotherapy<br>Buerkner, Paul; Westfaelische Wilhlems-Universitaet Muenster, Statistics<br>Bohlaender, Julian; Freie Universität Berlin, Clinical psychology and psychotherapy<br>Zetsche, Ulrike; Freie Universität Berlin, Clinical psychology and psychotherapy |
| Keywords:                     | affect regulation, cognitive control, major depression, borderline personality disorder, discarding, ambulatory assessment                                                                                                                                                                                                            |
|                               |                                                                                                                                                                                                                                                                                                                                       |

SCHOLARONE™  
Manuscripts

Peer Review Only

Word count: 5693

**Cognitive control and daily affect regulation in major depression and borderline  
personality disorder: a study protocol**

Lars Schulze<sup>1</sup>, Paul-Christian Bürkner<sup>2</sup>, Julian Bohländer<sup>1</sup>, Ulrike Zetsche\*<sup>1</sup>

1 Freie Universität Berlin, Department of Clinical Psychology and Psychotherapy, Berlin,  
Germany

2 University of Münster, Department of Statistics, Faculty of Psychology, Münster, Germany

\* Corresponding author. Ulrike Zetsche, Freie Universität Berlin, Department of Clinical  
Psychology and Psychotherapy, Habelschwerdter Allee 45, 14195 Berlin, Germany, phone:  
+49-30-838 55925; fax: +49-30-838 4 55925; [u.zetsche@fu-berlin.de](mailto:u.zetsche@fu-berlin.de)

**ABSTRACT**

**Introduction:** Affective disturbances and difficulty in affect regulation are core features of major depressive disorder (MDD) as well as borderline personality disorder (BPD). Whereas depressed individuals are characterized by affective inertia, individuals with BPD are characterized by affective instability. With regard to affect regulation, both groups have been found to use more maladaptive strategies, such as rumination or suppression, compared to healthy controls. Individuals with MDD or BPD might also employ adaptive regulation strategies (e.g., reappraisal) less *effectively* than healthy controls. Surprisingly, however, there have been hardly any studies directly comparing these two disorders to disentangle shared and disorder-specific deficits in affective dynamics and affect regulation.

Furthermore, theoretical models link deficits in affect regulation to deficits cognitive control functions. Given that individuals with MDD or BPD are both characterized by impairments in cognitive control, it will be intriguing to examine whether such impairments might explain their difficulty in affect regulation. The aim of the present study is thus to investigate the link between individual differences in cognitive control and disturbances in affect dynamics and regulation in the daily life of individuals with MDD or BPD.

**Methods and Analyses:** We will use a smartphone application to assess negative and positive affect as well as affect regulation strategies at eight times a day for seven days. We will further employ four computerized tasks to assess two cognitive control functions, namely interference control and discarding irrelevant information from working memory. Our hypotheses will be tested using a multi-method approach. Power analyses determined a sample size of 159 (53 MDD, 53 BPD, 53 Controls) to detect medium effect sizes.

**Ethics and Dissemination:** Ethics approval has been obtained from the Freie Universität Berlin. Data collection started in 01/2017 and will last till the end of 2018.

**Keywords:** Affect regulation, cognitive control, major depression, borderline personality disorder, interference control, discarding, ambulatory assessment

### Strengths and limitations of this study

- Real-time assessment of affect dynamics and affect regulation in daily life
- Assessing two prominent affective disorders (BPD and MDD) and a control group
- Linking the use and effectiveness of affect regulation strategies to individual differences in cognitive control functions (i.e. discarding of previously relevant information, interference control)

## INTRODUCTION

Affective disturbances are common among most mental disorders. In search of causes for these affective disturbances, impairments in the regulation of affective states have become a major interest in clinical psychology. The most prominent and generalized impairments in affect regulation (AR) are found in individuals with major depressive disorder (MDD) or borderline personality disorder (BPD)<sup>1 2</sup>. Although there is growing research examining abnormalities in the use and effectiveness of AR strategies, hardly any study has directly compared these two disorders to disentangle shared and disorder-specific deficits in affect regulation. In addition, theoretical models have linked effective AR to cognitive control functions, for reviews see<sup>3 4</sup>. Identification of abnormalities in affect regulation and its underlying cognitive mechanisms thus represents an important step in developing interventions to address deficits in affect regulation in these disorders.

The following paragraphs give an overview of previous findings on the use and effect of the three most researched AR strategies, i.e. rumination, suppression, and reappraisal in MDD and BPD, while highlighting important questions that have as yet remained unanswered.

### **Affect regulation in depression**

Affective disturbances in depression are characterized by both the experience of sustained negative affect i.e., affective inertia,<sup>5</sup> as well as difficulty experiencing positive affect. To gain a better understanding of these affective disturbances, recent research has focused on the way depressed individuals attempt to regulate their affect. Results revealed that depressed individuals as compared to healthy controls show a greater use of putatively maladaptive affect regulation strategies, for a review, see<sup>6</sup>. In this context, rumination has been identified as a particularly detrimental response to negative affect<sup>2</sup>. Rumination involves recurrent negative thoughts focused on one's depressive symptoms and the causes, meaning, and

1  
2  
3 consequences of these symptoms<sup>7</sup>. Rumination in response to negative affect has been shown  
4  
5 to intensify negative affect, increase negative memory recall, impair social problem solving,  
6  
7 and ultimately enhance the risk for the onset of new depressive episodes, for a review, see<sup>8</sup>.

8  
9 Another maladaptive regulation strategy that has been linked to depression is the suppression  
10  
11 of one's affect. Currently depressed as well as remitted depressed individuals have been found  
12  
13 to suppress their affective response to a greater degree than non-depressed individuals<sup>6,9</sup>.

14  
15 Although intended to reduce negative affect, suppression has been found to increase negative  
16  
17 affect<sup>9,10</sup>. On the other hand, evidence also suggests that depressed individuals are less likely  
18  
19 to use AR strategies that are beneficial in healthy individuals<sup>11</sup>. Cognitive reappraisal has  
20  
21 been shown to be a particularly effective means of AR<sup>12</sup>. Reappraisal involves changing the  
22  
23 meaning of a situation in order to alter the affect that follows<sup>13</sup>. In a recent meta-analysis,  
24  
25 decreased habitual use of reappraisal has been associated with depressive symptoms<sup>6</sup>. Thus,  
26  
27 evidence suggests that depression is associated with more frequent use of maladaptive AR  
28  
29 strategies, such as rumination or suppression, and less frequent use of adaptive strategies,  
30  
31 such as reappraisal.  
32  
33

34  
35 In addition, there is evidence suggesting that depressed individuals are not able to  
36  
37 employ putatively adaptive ER strategies as effectively as healthy individuals. Joormann and  
38  
39 colleagues, for example, demonstrated that currently depressed compared to healthy  
40  
41 individuals were not able to use positive memories to repair a negative affective state<sup>14</sup>.  
42  
43 Further research found that higher levels of depressive symptoms were associated with lower  
44  
45 reappraisal ability under high levels of stress<sup>15</sup>. Thus, strategies that are effective in regulating  
46  
47 negative affect in healthy individuals may not be as effective in the regulation of negative  
48  
49 affect in currently depressed individuals.  
50  
51  
52  
53  
54  
55  
56

### 57 **Affect regulation in borderline personality disorder**

58  
59  
60

1  
2  
3 The affective disturbance that is "at the core of borderline pathology"<sup>16</sup> is a pronounced  
4 instability of emotions<sup>17</sup>. Pivotal to the understanding of this pronounced instability are  
5 abnormalities in the processing and regulation of affective responses<sup>18 19</sup>.  
6  
7

8  
9       Regarding affect regulation, evidence suggests a more pronounced use of affect  
10 suppression in BPD<sup>20 21</sup>. In addition, heightened levels of rumination have been reported in  
11 BPD as compared to healthy individuals<sup>22 23</sup>. Students with pronounced traits of borderline  
12 personality demonstrate a generally increased use of adaptive as well as maladaptive AR  
13 strategies to regulate affective states<sup>24</sup>.  
14  
15

16  
17       Only recently, studies have begun to examine the effectiveness of AR strategies in  
18 BPD. In contrast to findings in healthy individuals and patients with MDD, the suppression of  
19 affective responses was found to decrease negative affect and to attenuate impulsive  
20 behavior<sup>25</sup>. Recent findings provided further support that affect suppression may have an  
21 adaptive function in BPD<sup>26</sup>. In addition, findings suggest that individuals with BPD as  
22 compared to healthy controls use cognitive reappraisal less efficiently to attenuate negative  
23 affect<sup>27 28</sup>. This might be due to difficulties in the generation and implementation of  
24 alternative appraisals of affect-generating stimuli<sup>18</sup>.  
25  
26  
27  
28  
29  
30  
31  
32  
33  
34  
35  
36  
37  
38  
39

#### 40 **Affect regulation and cognitive control deficits**

41 The mechanisms underlying impairments in effective affect regulation are not yet well  
42 researched. Several researchers have suggested that cognitive control functions play an  
43 important role in effective affect regulation<sup>3 4</sup>. Affective states are associated with the  
44 activation of affect congruent cognitions in working memory. The ability to control affective  
45 contents in working memory may thus be essential for effective affect regulation. It is  
46 important to note, that cognitive control is not a unitary construct but consists of several  
47 components, such as response inhibition, discarding of no longer relevant material from  
48 working memory, or interference control (i.e. resistance to distractor interference)<sup>29 30</sup>.  
49  
50  
51  
52  
53  
54  
55  
56  
57  
58  
59



1  
2  
3           Impairments in cognitive control have been generally linked to both BPD<sup>31-34</sup> and  
4 depression symptoms<sup>35-38</sup>. Importantly, impairments in cognitive control have also been  
5 directly linked to disturbances in affect regulation: more frequent *use* of rumination has been  
6 related to difficulty discarding no longer relevant material from working memory<sup>39</sup>, whereas  
7 more frequent use of suppression has been linked to impairments in interference control of  
8 negative material<sup>40</sup>. In addition, less frequent use of reappraisal may be related to difficulty in  
9 interference control<sup>40 41</sup>.

10  
11  
12           Fewer studies have assessed the role cognitive control plays in the *effectiveness* of ER  
13 strategies. First evidence implies that deficits in the ability to discard previously relevant  
14 information from working memory confine the benefits of reappraisal and increase the  
15 detrimental effects of rumination<sup>42 43</sup>. However, this has not yet been assessed in a clinical  
16 sample. It will therefore be crucial to examine the link between differences in the cognitive  
17 control of affective material and the effectiveness of daily affect regulation in clinical  
18 samples.

### 19 20 21 22 23 24 25 26 27 28 29 30 31 32 33 34 35 **Research questions and hypotheses**

36  
37 The present project combines the assessment of daily affective dynamics, daily affect  
38 regulation strategies, and cognitive control abilities in individuals with MDD, individuals with  
39 BPD, and healthy controls. This design is a compelling framework to examine the following  
40 research questions:  
41  
42  
43  
44  
45  
46  
47

#### 48 1. Affective Dynamics

49  
50 *Research Question:* Do healthy controls, individuals with MDD, and individuals with BPD  
51 differ in their affective dynamics (i.e., affective inertia, affective instability) in daily life?  
52  
53

54 *Hypotheses:* We expect a main effect of group on each measure of affect dynamics.  
55

56 Specifically, we expect that individuals with BPD show more affective instability than  
57  
58  
59  
60

1  
2 individuals with MDD or healthy controls, when controlling for affective variability<sup>5</sup>. Further,  
3  
4 we expect that individuals with MDD or BPD show higher affective variability than healthy  
5  
6 controls, even after controlling for inertia. Finally, we expect that individuals with BPD show  
7  
8 less affective inertia than individuals with MDD or healthy controls, when controlling for  
9  
10 affective variability.  
11  
12  
13  
14  
15

## 16 2. Use of affect regulation strategies

17  
18 *Research Question:* Do healthy controls, individuals with MDD, and individuals with BPD  
19  
20 differ in their habitual use of different affect regulation strategies?  
21

22 *Hypotheses:* First, we expect a main effect of group on general intensity of affect regulation.  
23  
24 That is, we expect that individuals with BPD or MDD generally employ affect regulation  
25  
26 strategies more often than healthy controls. Second, we expect an interaction between group  
27  
28 and kind of strategy<sup>6 20 22 24</sup>. That is, we expect that individuals with BPD or MDD select  
29  
30 rumination or suppression more often than reappraisal. In contrast, we expect that healthy  
31  
32 controls select reappraisal more often than rumination or suppression.  
33  
34  
35  
36

## 37 3. Effect of affect regulation strategies on affect

38  
39 *Research Questions:* Does the effectiveness of affect regulation strategies differ between  
40  
41 healthy controls, individuals with MDD, and individuals with BPD?  
42

43  
44 *Hypotheses:* We expect an interaction effect between group and kind of strategy on affect  
45  
46 ratings. Specifically, we expect that **rumination** intensity assessed as time t will be associated  
47  
48 with higher negative affect at time t when controlling for negative affect at t-1 in individuals  
49  
50 with MDD or BPD than in healthy controls<sup>44 45</sup>. Note, that rumination assessed at time t  
51  
52 reflects the intensity in the interval between time t-1 and time t.  
53  
54  
55  
56  
57  
58  
59  
60

1  
2  
3 The intensity of **suppression** assessed at time t will be associated with lower negative  
4 affect at time t when controlling for negative affect at t-1 in individuals with BPD<sup>24 26</sup>, but not  
5 in individuals with MDD and healthy controls<sup>9 10</sup>.  
6  
7

8  
9 The intensity of **reappraisal** assessed at time t will be associated with more negative  
10 affect at time t when controlling for negative affect at t-1 in individuals with BPD or MDD as  
11 compared to healthy controls<sup>15 18 27</sup>.  
12  
13  
14

#### 15 16 17 18 4. Group differences in cognitive control

19  
20 *Research Question:* Do healthy controls, individuals with MDD, and individuals with BPD  
21 differ in their ability to control affective material in working memory?  
22

23  
24 *Hypotheses:* We expect an interaction effect between group and experimental condition on  
25 response latencies. Specifically, we expect that individuals with MDD or BPD as compared to  
26 healthy controls show impairments in **interference control** of affective stimuli, reflected in  
27 slower response latencies in experimental as compared to control trials<sup>31 46</sup>.  
28  
29

30  
31 Similarly, we expect that individuals with MDD as compared to healthy controls show  
32 impairments in **discarding** no longer relevant negative material from working memory,  
33 reflected in slower response latencies in experimental as compared to control trials<sup>37</sup>.  
34  
35  
36  
37  
38  
39  
40

#### 41 42 5. Cognitive control and affect regulation

43  
44 *Research question:* Are impairments in cognitive control functions related to differences in  
45 the use or effectiveness of affect regulation strategies?  
46

47  
48 *Hypotheses:* We expect an interaction between the respective cognitive control index  
49 and kind of strategy on intensity ratings (i.e., strategy use). That is, we expect that individual  
50 differences in **discarding** affective material from working memory will be negatively  
51 associated with more frequent use of rumination<sup>37 39 40</sup>.  
52  
53  
54  
55  
56  
57  
58  
59  
60

1  
2  
3 In addition, we expect that individual differences in **interference control** will be  
4 negatively associated with using suppression and positively associated with using  
5 reappraisal<sup>37</sup>.  
6  
7

8  
9 We further expect an interaction between the respective cognitive control index and  
10 kind of strategy on negative affect ratings at time t. That is, we expect that individual  
11 differences in **discarding** affective material from working memory when using rumination  
12 will be associated with higher negative affect at time t when controlling for negative affect at  
13 time t-1<sup>42 43</sup>. Further, we expect that individual differences in discarding affective material  
14 from working memory when using reappraisal will be associated with less negative affect at  
15 time t when controlling for negative affect at time t-1<sup>42 43</sup>.  
16  
17  
18  
19  
20  
21  
22  
23  
24  
25

26 Note, that the number of studies directly comparing individuals with MDD and BPD  
27 regarding affective dynamics, affect regulation strategies, or cognitive control abilities is very  
28 limited. Thus, the literature only allows to formulate specific hypotheses on differences  
29 between the clinical groups and the control group. It will be intriguing to examine differences  
30 and similarities between individuals with MDD and individuals with BPD in the assessed  
31 variables.  
32  
33  
34  
35  
36  
37  
38  
39  
40  
41  
42  
43  
44  
45  
46  
47  
48  
49  
50  
51  
52  
53  
54  
55  
56  
57  
58  
59  
60

## METHODS AND ANALYSES

### Participants

The present research project includes three groups of participants: individuals with BPD, individuals with current MDD, and healthy control participants. The sample size is targeted at 53 participants per group (for details see power analysis).

#### General inclusion and exclusion criteria

Participants will be between age 18 and 65 years and speak German as their native language (due to verbal demands in the experimental tasks). Participants need to provide written informed consent for participation in the study. Participants will be excluded if they

- are pregnant,
- report of severe head trauma or any known neurological diseases,
- report any past or present psychotic symptoms,
- meet criteria for bipolar disorder or any psychotic disorder,
- meet criteria for substance dependency within the last 12 months

Patients taking psychotropic medication will not be excluded. However, there must be no change in medication for at least four weeks prior to as well as during the entire assessment period. Medication type and dose will be assessed. In-patients will not be included in the study.

#### Major Depressive Disorder (MDD) group

Participants included in the MDD group will meet Diagnostic and Statistical Manual of Mental Disorders (DSM-IV) criteria for a current major depressive episode. The duration of the current episode as well as the number of past episodes will be assessed but won't be decisive for inclusion into the study. Due to high rates of comorbidity among MDD and other

mood and anxiety disorders, individuals with a comorbid mood (except bipolar disorders) or anxiety disorder will be included. Depressed individuals meeting more than two DSM-IV criteria for BPD will be excluded.

#### Borderline personality disorder (BPD) group

Participants included in the BPD group will meet DSM-IV criteria for borderline personality disorder. Due to high rates of Axis-I and Axis-II comorbidity in BPD presence of comorbid disorders will be allowed for study inclusion with the exception of a current major depressive episode, substance dependency within the last 12 months, bipolar or psychotic disorders.

#### Healthy control group

Participants included in the healthy control group have to be free of any past or present mental disorder according to DSM-IV criteria. The absence of any mental disorder will be confirmed by Structured Clinical Interview for DSM (SCID-I) and SCID-II interviews. Participants in the control group will be free of any psychotropic medication. Furthermore, control participants will be excluded if they meet more than two DSM-IV criteria for BPD or any of the two cardinal DSM-IV criteria for MDD.

#### Recruitment

Individuals with MDD or BPD will be recruited through advertisements posted at cooperating counseling institutions, various sites within the community, and in online newspapers.

Healthy control participants will be recruited through postings at various sites within the community and in online newspapers.

In addition, depressed participants will be recruited from the local outpatient clinic at Freie Universität Berlin (Head: Prof. Dr. Babette Renneberg). Participants with BPD will also

1  
2  
3 be recruited at the Department for Psychiatry and Psychotherapy at Charité Berlin (Head:  
4  
5 Prof. Dr. Stefan Röpke).

### 9 **Assessment of psychopathology**

10  
11 All participants will be interviewed using the Structured Clinical Interview for DSM-IV Axis-  
12  
13 I<sup>47</sup> and Axis-II disorders<sup>48</sup>. Diagnostic interviews will be conducted by trained interviewers.

14  
15 Participants' intelligence will be estimated by measuring cognitive capabilities<sup>49</sup>.

16  
17  
18 The following instruments will assess disorder-specific and general psychopathology:  
19  
20 The Beck Depression Inventory II (BDI-II)<sup>50 51</sup>; the Borderline Symptom List (BSL-23)<sup>52</sup>; the  
21  
22 Brief Symptom Inventory (BSI)<sup>53 54</sup>; the German version of the 10-item Response Style  
23  
24 Questionnaire (RSQ)<sup>55</sup>. Finally the German version of the Positive and Negative Affect  
25  
26 Schedule (PANAS)<sup>56</sup> as well as the Dissociative Tension Scale (DSS-4)<sup>57</sup> will be used to  
27  
28 assess mood fluctuations and dissociative states in the laboratory sessions.

29  
30  
31 In addition, all individuals with BPD or MDD will be asked about any current and/or  
32  
33 past psychotherapy.

### 37 **Ambulatory assessment of daily affect and affect regulation**

38  
39 All participants receive a smartphone including an App for ambulatory assessment.

40  
41 Participants will be instructed to go on with their daily activities and respond to several  
42  
43 questions when indicated by a beep. The Smartphone App will be individually programmed to  
44  
45 beep 8 times a day for 7 consecutive days with the daily sampling period comprising 12  
46  
47 hours. The sampling period will be divided into 8 time blocks of equal length and the auditory  
48  
49 signal will occur pseudo-randomly within each time block, with a minimum of 1h between  
50  
51 beeps<sup>42</sup>. Responses will be time-stamped by the software.

52  
53  
54 Following each prompt, participants will indicate on a scale from 1 (not at all) to 7  
55  
56 (very much) how angry, anxious, ashamed, cheerful, depressed, happy, and tense they feel  
57  
58

(i.e. 'How did you feel just before the beep?'). Given that individuals with BPD may have problems in correct emotion identification, the average score across all negative affect ratings (i.e., angry, anxious, ashamed, depressed, tense) will be used to assess the impact of ER strategies on negative affect. Next, participants will be asked to indicate on a scale from 1 (not at all) to 7 (very much) how much they used the following strategies since the last beep: rumination ('I thought over and over again about a situation or my feelings'; 'How negative were these thoughts?'), suppression ('I controlled my emotion by not showing them'), reappraisal (I have thought about the situation in a different way.'). To control for overall degree of ER strategy use<sup>24</sup>, participants are also asked about the implementation of other widely used or disorder-relevant ER strategies<sup>16,58</sup>. These are acceptance ('I accepted the situation and/or my situation'), distraction ('I found an activity to keep myself busy and distracted'), and social sharing ('I found someone to talk to about my feelings'). In addition, individuals with a history of self-injurious behavior will be asked how much they felt an urge to injure themselves. At the first daily beep, all participants will be asked to indicate on a scale from 1 (not at all) to 7 (very well) how well they slept last night.

Participants will receive an extra incentive for responding to more than 90% of beeps.

### **Assessment of cognitive control**

#### **1. Discarding of no longer relevant information from working memory**

##### *Working Memory Selection Task (WMST)*

The WMST assesses the ability to discard no longer relevant affective information from working memory<sup>37</sup>.

Each trial of the WMST consists of three consecutive displays: a learning display, a cue display, and a probe display. On the learning display, participants are presented with two rows of three words each, one row printed in red and the other row printed in blue.



1  
2  
3 Participants are instructed to memorize all six words. On the following cue display, a red or  
4 blue frame is presented indicating which row of words will be relevant for the upcoming  
5 response. Participants are instructed to keep only the relevant set in mind and disregard the  
6 other three words. Finally, on the probe display, a probe word is presented and participants  
7 are asked to decide whether or not the probe is from the relevant word set.  
8  
9  
10  
11  
12

13 The probe may either be a word from the relevant word set (relevant probe), a word  
14 that participants had to learn but were then asked to forget (suppress probe), or a new word  
15 that had not been presented before (novel probe). Thus, participants have to reject both  
16 suppress probes and novel probes. It has been shown that participants take longer to reject a  
17 suppress probe compared to a novel probe<sup>59</sup> and it has been suggested that this difference in  
18 reaction times reflects the residual activation of the no-longer-relevant suppress word. Thus,  
19 the ability to discard no longer relevant material from working memory is measured by  
20 reaction times (RT) to suppress probes compared to novel probes. In the present version of the  
21 task, on critical trials, the red and blue rows of words include either only positive or only  
22 negative words, and the two rows always differ in valence. Thus, here we will compare the  
23 ability to discard irrelevant negative or positive information, respectively. All word stimuli  
24 are taken from the Berlin Affective Word List Reloaded (BAWL-R)<sup>60</sup>.  
25  
26  
27  
28  
29  
30  
31  
32  
33  
34  
35  
36  
37  
38  
39  
40  
41  
42

#### 43 *Removal and Updating Task (RUT)*

44 The Removal and Updating Task is based on a letter updating task<sup>61</sup> adapted by Chang, Ecker  
45 & Page<sup>62</sup>. It measures the ability to remove no longer relevant affective contents from  
46 working memory (WM).  
47  
48  
49

50 Each trial begins with the presentation of three words in three frames for 3000 ms and  
51 participant are asked to memorize the words. Next, the words disappear and a variable  
52 number of updating steps follows. At each updating step, one of the three words is cued for  
53 removal, indicated by the respective frame turning into red color. Then, a new word is  
54  
55  
56  
57  
58  
59  
60

presented in the cued frame and participants are asked to replace in mind the memorized word with the new word. Participants indicate the completion of their updating process by key-press. The reaction time between the presentation of the new word and participants' key-press serves as dependent variable.

Importantly, the time between the removal cue and the presentation of the new word is varied ("cue-target-interval", CTI). In long CTI conditions (1500ms), the CTI allows for a complete removal process, so that the reaction time between the presentation of the new word and participants' key press only reflects the encoding of the new word. In the short CTI condition (200ms), the CTI does not allow for a complete removal process, so that the reaction time reflects the removal process and the encoding of the new word. Thus, the measure of an individual's removal speed is the comparison between RTs in trials with short and long CTI. Indices reflecting the removal of negative or positive words can be computed. All word stimuli are taken from the BAWL-R.

To control for general updating ability, participants also complete a neutral version of the removal and updating task<sup>61</sup> including letters instead of words.

## 2. Interference Control

### *Delayed working memory paradigm*

This paradigm measures the ability to control interference from affectively distracting stimuli during working memory performance<sup>63</sup>.

On each trial, six capital letters are presented for 1500ms and participants are asked to memorize them. The presentation of the letters is followed by a delay period of 2000 ms, and the presentation of another single letter. Participants have to decide whether or not the single letter was part of the initial block of letters. During the delay period, participants are either presented with a blank screen, a neutral or a negative picture. All picture stimuli are taken

1  
2  
3 from the International Affective Picture System (IAPS)<sup>64</sup>. Neutral and negative IAPS stimuli  
4  
5 are matched for social content and perceptual complexity.

6  
7 The ability to control interference from irrelevant information will be examined by  
8  
9 comparing response latencies between blank screens, neutral, and negative stimuli presented  
10  
11 in the delay period.  
12

### 13 14 15 *Stroop Paradigm*

16  
17 The Stroop task is based on a paradigm by Etkin and colleagues<sup>65 66</sup> and measures the ability  
18  
19 to control interference from simultaneously presented irrelevant information.  
20  
21

22 Each trial consists of the presentation of a happy or an angry facial expression with the  
23  
24 word “Anger” or “Happiness” printed across the facial expression. Participants are asked to  
25  
26 ignore the words and to indicate by button press whether the face picture displays an angry or  
27  
28 happy facial expression. Facial expressions and words are either congruent or incongruent.  
29  
30 Each picture/word combination is presented for 1000 ms. All facial expressions are taken  
31  
32 from the original Ekman faces set<sup>67</sup>.  
33  
34

35 The ability to control interference from irrelevant information is assessed by the  
36  
37 classical behavioral interference effect (i.e. response latencies to incongruent trials as  
38  
39 compared to response latencies to congruent trials). In addition, trials can be classified based  
40  
41 on the congruence of the previous trial: congruent trial following a congruent trial (cC),  
42  
43 incongruent trial following a congruent trail (cI), congruent trial following an incongruent  
44  
45 trial (iC), and incongruent trial following an incongruent trial (iI).  
46  
47  
48  
49

### 50 **Additional Measures**

51  
52 Prediction and Recall of affect, sleep, and affect regulation strategies

53  
54 In the first laboratory session, participants will be presented with all items from the  
55  
56 ambulatory assessment (e.g., affect, affect regulation strategies, sleep) and asked to indicate  
57  
58  
59

1  
2  
3 on a scale from 0 (not at all) to 7 (very much) how much they expect to feel or behave this  
4  
5 way (on average) during the following seven days. At the end of the ambulatory assessment  
6  
7 period, participants will be presented with all items from the ambulatory assessment again and  
8  
9 asked to indicate on a scale from 0 (not at all) to 7 (very much) how much they had felt or  
10  
11 behaved this way (on average) during the past seven days.  
12  
13

### 14 15 16 Electrocardiogram

17  
18 At the end of the second laboratory session, participants will be asked to put on an ECG chest  
19  
20 belt to measure their resting state heart rate variability for a 5-minute period. Participants are  
21  
22 asked to relax during the ECG assessment.  
23  
24

### 25 26 27 Movement

28  
29 During the seven-day ambulatory assessment period, participants will be asked to wear an  
30  
31 accelerometer attached to their hips. The accelerometer continuously assesses data regarding  
32  
33 participants' acceleration in all three geometric axes, context temperature, and air pressure<sup>68</sup>.  
34  
35 This will allow to examine individual levels of physical activity and energy expenditure  
36  
37 during the ambulatory assessment period.  
38  
39  
40

### 41 42 43 **Procedures**

44  
45 The procedure of this project is depicted in Figure 1. Ethics approval has been obtained from  
46  
47 the Freie Universität Berlin. Data collection started in 01/2017 and will last till the end of  
48  
49 2018.  
50  
51

### 52 53 54 **Sample size determination**

55  
56 Power analysis for group differences in cognitive control  
57  
58  
59  
60

1  
2  
3 Previous studies examining impairments in valence-dependent cognitive control in depressed  
4 compared to control participants yielded medium between group effect sizes (WMST task:  
5 e.g.,  $d=0.78$ )<sup>37</sup>. Similar effect sizes were obtained for group differences in valence-dependent  
6 cognitive control between individuals with BPD and healthy controls (interference control:  
7 e.g.,  $d=0.89$ )<sup>31</sup>. To detect medium sized group differences in cognitive control functions using  
8 univariate ANOVAs, a total sample size of  $N=159$  ( $N=53$  per group) is needed as determined  
9 using G\*Power (assuming  $\alpha=.05$ , power of .8). For selected post-hoc group comparisons, a  
10 group size of  $N=51$  is required (assuming  $\alpha=.05$ , power of .8, allocation ratio = 1). Note, that  
11 we will use multi-level modeling to test group differences in cognitive control. Given that  
12 multi-level modeling includes several assessment points per individual, the intended sample  
13 size of  $N=159$  will be more than sufficient to detect medium sized group differences in  
14 cognitive control using multi-level modeling.  
15  
16  
17  
18  
19  
20  
21  
22  
23  
24  
25  
26  
27  
28  
29  
30

#### 31 Power analysis for ambulatory assessment data

32 A sample size of  $N=159$  that is required for the experimental part of the study is also large  
33 enough to ensure appropriate power for analyzing the ambulatory assessment data. For the  
34 ambulatory assessment part, all variables will be assessed 8 times a day for 7 consecutive  
35 days. For the multilevel analysis this would mean that there are 56 occasions of measurement  
36 nested within 159 individuals resulting in 8904 data points. For variable affective states it is  
37 reasonable to assume an intraclass correlation of 0.30 resulting in a design effect of  $DE =$   
38  $21.7$ <sup>69</sup>. Therefore, our multilevel analysis would be approximately comparable to a classical  
39 multiple regression analysis with 410 individuals<sup>69</sup>. Given this sample size it would be  
40 possible to detect a small interaction effect between two independent variables (partial  $R^2 =$   
41  $0.01$ ) in a multiple regression analysis with a power of .8 (assuming  $\alpha=.05$ ).  
42  
43  
44  
45  
46  
47  
48  
49  
50  
51  
52  
53  
54  
55  
56

#### 57 Data analysis

### 1. Affective dynamics

To assess whether groups differ in their affective dynamics (i.e., inertia, instability, variability), we will calculate three different within-person measures for both positive and negative affect<sup>70</sup>: (a) Affective variability will be assessed by the within-subject standard deviation of the respective affect scale. (b) Affective instability will be calculated as the within-subject root Mean Square Successive Difference (rMSSD) between consecutive affect measures. (c) Inertia will be assessed by the temporal dependency of consecutive affect measures, i.e., the within-subject lag-one autocorrelation. Autocorrelations will be Fisher's z transformed to normalize their distribution.

Based on the distribution of the respective indices, we will select adequate methods for testing group differences. We will further examine whether controlling for mean levels of positive or negative affect will have an impact on the main effect of Group<sup>71</sup>.

### 2./3. Group differences in the use and effectiveness of affect regulation strategies

To examine whether groups differ in the frequency of using rumination, suppression, or reappraisal, we will employ hierarchical linear modeling. The dependent variable will be the intensity rating of the ER strategies assessed at time t. The predictor variables of interest will be Group (BPD, MDD, CTL) and the specific Strategy (reappraisal, rumination, suppression, distraction, acceptance, social sharing).

To examine whether the effectiveness of rumination, suppression, or reappraisal differs among groups, we will employ hierarchical linear modeling. The dependent variable will be the respective affect rating (positive or negative) at time t. Affect ratings at time t-1 will be entered as predictor. Predictor variables of main interest will be Group (BPD, MDD, CTL) and the intensity of each assessed ER Strategy (reappraisal, rumination, suppression, distraction, acceptance, social sharing) employed between time t-1 and time t.

#### 4. Group differences in cognitive control functions

Reaction time data from the behavioral experiments will be cleansed according to the following procedures: outliers in response latencies will be defined as values below or above the upper or lower fences of each individual's distribution in each experimental condition. Outliers will be eliminated. In addition, participants will be excluded from analyses if their overall accuracy level indicates that the task was not sufficiently understood.

In a first step, group differences in cognitive control functions will be analyzed using separate multi-level models per experiment. Response latency will be the dependent variable. The Experimental Condition, Stimuli Valence (where applicable), and Group will be entered as predictor variables.

In a second step, composite scores for the ability to discard irrelevant information from working memory, and for the ability to control interference from distracting information will be generated. Group differences on these composite scores will be examined by using multi-level models. The respective composite score will be the dependent variable. Stimuli Valence and Group will be entered as predictor variables.

#### 5. Relating cognitive control functions and affect regulation

a. To examine whether the *use* of rumination, suppression, or reappraisal will be related to individual differences in cognitive control functions, we will employ hierarchical linear modeling. The dependent variable will be the intensity rating of the ER strategies assessed at time *t*. The predictor variables of interest will be the specific Strategy (reappraisal, rumination, suppression, distraction, acceptance, social sharing), and the Cognitive Control scores, as detailed below.

b. To examine whether the *effectiveness* of reappraisal, rumination, or suppression will be related to individual differences in cognitive control functions, we will also employ hierarchical linear modeling. The dependent variable will be the respective affect rating

1  
2  
3 (positive or negative) at time t. Affect ratings at time t-1 will be entered as predictor variable  
4  
5 (see 2./3.). Further predictor variables of interest will be Group (BPD, MDD, CTL), the  
6  
7 Cognitive Control scores (see below), and the Intensity of each assessed ER strategy  
8  
9 (reappraisal, rumination, suppression, distraction, acceptance, social sharing) employed  
10  
11 between time t-1 and time t.  
12

13  
14 Cognitive control indices for each experiment will be computed as follows: For the  
15  
16 'Working Memory Selection Task', the discarding index will be computed as the median  
17  
18 response latency to suppress probes minus the median response latency to novel probes of the  
19  
20 same valence. Two separate difference scores, one for each valence condition (positive,  
21  
22 negative), will be computed.  
23

24  
25 For the Removal and Updating task, the removal index will be assessed as the  
26  
27 difference in response latencies between trials with short and long CTIs. This difference will  
28  
29 be computed as a proportional gain score accounting for general processing speed (i.e.,  
30  
31  $\text{Removal Speed} = [\text{mean}(\text{short CTI}) - \text{mean}(\text{long CTI})] / \text{mean}(\text{short CTI})$ ). We will calculate  
32  
33 two separate removal time indices for the removal of negative and positive words,  
34  
35 respectively.  
36

37  
38 For the Stroop Task, the classical behavioral interference effect (i.e. response latencies  
39  
40 to incongruent trials minus response latencies to congruent trials) will be computed.  
41

42  
43 In the 'Delayed Working Memory Task', a general distraction score will be computed  
44  
45 by subtracting response latencies in trials with blank screens presented in the delay period  
46  
47 from response latencies in trials with neutral and negative IAPS stimuli presented in the delay  
48  
49 period. In addition, we will calculate an 'affective distraction score' by subtracting response  
50  
51 latencies for neutral stimuli from response latencies for negative stimuli.  
52  
53  
54  
55  
56  
57  
58  
59  
60



**References**

1. Linehan MM, Bohus M, Lynch TR. Dialectical Behavior Therapy for Pervasive Emotion Dysregulation: Theoretical and Practical Underpinnings. In: Gross JJ, editor. *Handbook of emotion regulation*. New York, NY US: Guilford Press, 2007:581-605.
2. Nolen-Hoeksema S, Wisco BE, Lyubomirsky S. Rethinking rumination. *Perspectives on Psychological Science* 2008;3(5):400-24.
3. Joormann J, D'Avanzato C. Emotion regulation in depression: Examining the role of cognitive processes. *Cognition and Emotion* 2010;24(6):913-39.
4. Ochsner KN, Gross JJ. The cognitive control of emotion. *Trends in Cognitive Sciences* 2005;9(5):242-49.
5. Koval P, Kuppens P, Allen NB, Sheeber L. Getting stuck in depression: The roles of rumination and emotional inertia. *Cognition and Emotion* 2012;26(8):1412-27.
6. Aldao A, Nolen-Hoeksema S, Schweizer S. Emotion-regulation strategies across psychopathology: A meta-analytic review. *Clinical Psychology Review* 2010;30(2):217-37.
7. Nolen-Hoeksema S, Morrow J. A prospective study of depression and posttraumatic stress symptoms after a natural disaster: the 1989 Loma Prieta Earthquake. *Journal of Personality and Social Psychology* 1991;61(1):115.
8. Watkins ER. Constructive and unconstructive repetitive thought. *Psychological Bulletin* 2008;134(2):163-206.
9. Ehring T, Tuschen-Caffier B, Schnülle J, Fischer S, Gross JJ. Emotion regulation and vulnerability to depression: Spontaneous versus instructed use of emotion suppression and reappraisal. *Emotion* 2010;10(4):563-72.
10. Quigley L, Dobson KS. An examination of trait, spontaneous and instructed emotion regulation in dysphoria. *Cognition and Emotion* 2014;28(4):622-35.

- 1  
2  
3 11. D'Avanzato C, Joormann J, Siemer M, Gotlib IH. Emotion regulation in depression and  
4  
5 anxiety: Examining diagnostic specificity and stability of strategy use. *Cognitive*  
6  
7 *Therapy and Research* 2013.
- 8  
9 12. Gross JJ, John OP. Individual differences in two emotion regulation processes:  
10  
11 implications for affect, relationships, and well-being. *Journal of Personality and*  
12  
13 *Social Psychology* 2003;85(2):348.
- 14  
15 13. McRae K, Jacobs SE, Ray RD, John OP, Gross JJ. Individual differences in reappraisal  
16  
17 ability: Links to reappraisal frequency, well-being, and cognitive control. *Journal of*  
18  
19 *Research in Personality* 2012;46(1):2-7.
- 20  
21 14. Joormann J, Siemer M, Gotlib IH. Mood regulation in depression: Differential effects of  
22  
23 distraction and recall of happy memories on sad mood. *Journal of Abnormal*  
24  
25 *Psychology* 2007;116(3):484-90.
- 26  
27 15. Troy AS, Wilhelm FH, Shallcross AJ, Mauss IB. Seeing the silver lining: Cognitive  
28  
29 reappraisal ability moderates the relationship between stress and depressive  
30  
31 symptoms. *Emotion* 2010;10(6):783-95.
- 32  
33 16. Stiglmayr C, Grathwol T, Linehan MM, Ihorst G, Fahrenberg J, Bohus M. Aversive  
34  
35 tension in patients with borderline personality disorder: a computer-based controlled  
36  
37 field study. *Acta psychiatrica Scandinavica* 2005;111(5):372-9.
- 38  
39 17. Ebner-Priemer UW, Kuo J, Kleindienst N, Welch SS, Reisch T, Reinhard I, et al. State  
40  
41 affective instability in borderline personality disorder assessed by ambulatory  
42  
43 monitoring. *Psychological Medicine* 2007;37(07):961-70.
- 44  
45 18. Schulze L, Domes G, Kruger A, Berger C, Fleischer M, Prehn K, et al. Neuronal  
46  
47 correlates of cognitive reappraisal in borderline patients with affective instability.  
48  
49 *Biological Psychiatry* 2011;69(6):564-73.
- 50  
51  
52  
53  
54  
55  
56  
57  
58  
59  
60

- 1  
2  
3 19. Schulze L, Schmahl C, Niedtfeld I. Neural correlates of disturbed emotion processing in  
4  
5 borderline personality disorder: a multimodal meta-analysis. *Biological Psychiatry*  
6  
7 2016;79(2):97-106.  
8
- 9 20. Beblo T, Fernando S, Kamper P, Griepenstroh J, Aschenbrenner S, Pastuszak A, et al.  
10  
11 Increased attempts to suppress negative and positive emotions in Borderline  
12  
13 Personality Disorder. *Psychiatry Research* 2013.  
14
- 15 21. Chapman AL, Specht MW, Cellucci T. Borderline personality disorder and deliberate  
16  
17 self-harm: Does experiential avoidance play a role? *Suicide Life-Threat*  
18  
19 2005;35(4):388-99.  
20  
21
- 22 22. Abela JRZ, Payne AVL, Moussaly N. Cognitive Vulnerability to Depression in  
23  
24 Individuals With Borderline Personality Disorder. *Journal of Personality Disorders*  
25  
26 2003;17(4):319-29.  
27
- 28 23. Baer RA, Sauer SE. Relationships Between Depressive Rumination, Anger Rumination,  
29  
30 and Borderline Personality Features. *Personality Disorders: Theory, Research, and*  
31  
32 *Treatment* 2011;2(2):142-50.  
33  
34
- 35 24. Chapman AL, Dixon-Gordon KL, Waiters K, N. Borderline personality features moderate  
36  
37 emotion reactivity and emotion regulation in response to a fear stressor. *Journal of*  
38  
39 *Experimental Psychopathology* 2013:1-20.  
40
- 41 25. Chapman AL, Rosenthal MZ, Leung DW. Emotion suppression in borderline personality  
42  
43 disorder: An experience sampling study. *Journal of Personality Disorders*  
44  
45 2009;23(1):29-47.  
46  
47
- 48 26. Svaldi J, Dorn C, Matthies S, Philipsen A. Effects of suppression and acceptance of  
49  
50 sadness on the urge for non-suicidal self-injury and self-punishment. *Psychiatry*  
51  
52 *Research* 2012;200(2-3):404-16.  
53
- 54 27. Koenigsberg HW, Fan J, Ochsner KN, Liu X, Guise KG, Pizzarello S, et al. Neural  
55  
56 correlates of the use of psychological distancing to regulate responses to negative  
57  
58  
59  
60

- 1  
2  
3 social cues: a study of patients with borderline personality disorder. *Biological*  
4  
5 *Psychiatry* 2009;66(9):854-63.  
6  
7 28. Lang S, Kotchoubey B, Frick C, Spitzer C, Grabe HJ, Barnow S. Cognitive reappraisal in  
8  
9 trauma-exposed women with borderline personality disorder. *Neuroimage*  
10  
11 2012;59(2):1727-34.  
12  
13 29. Miyake A, Friedman NP. The nature and organization of individual differences in  
14  
15 executive functions four general conclusions. *Current directions in psychological*  
16  
17 *science* 2012;21(1):8-14.  
18  
19 30. Friedman NP, Miyake A. The relations among inhibition and interference control  
20  
21 functions: A latent-variable analysis. *Journal of Experimental Psychology: General*  
22  
23 2004;133(1):101-35.  
24  
25 31. Krause-Utz A, Oei NYL, Niedtfeld I, Bohus M, Spinhoven P, Schmahl C, et al. Influence  
26  
27 of emotional distraction on working memory performance in borderline personality  
28  
29 disorder. *Psychological Medicine* 2012;42(10):2181-92.  
30  
31  
32 32. Prehn K, Schulze L, Rossmann S, Berger C, Vohs K, Fleischer M, et al. Effects of  
33  
34 emotional stimuli on working memory processes in male criminal offenders with  
35  
36 borderline and antisocial personality disorder. *World Journal of Biological Psychiatry*  
37  
38 2013;14(1):71-78.  
39  
40  
41 33. Wingenfeld K, Mensebach C, Rullkoetter N, Schlosser N, Schaffrath C, Woermann FG, et  
42  
43 al. Attentional Bias to Personally Relevant Words in Borderline Personality Disorder  
44  
45 Is Strongly Related to Comorbid Posttraumatic Stress Disorder. *Journal of Personality*  
46  
47 *Disorders* 2009;23(2):141-55.  
48  
49  
50 34. Domes G, Winter B, Schnell K, Vohs K, Fast K, Herpertz SC. The influence of emotions  
51  
52 on inhibitory functioning in borderline personality disorder. *Psychological Medicine*  
53  
54 2006;36(8):1163-72.  
55  
56  
57  
58  
59  
60

- 1  
2  
3 35. Goeleven E, De Raedt R, Baert S, Koster EHW. Deficient inhibition of emotional  
4 information in depression. *Journal of Affective Disorders* 2006;93(1-3):149-57.  
5  
6  
7 36. Lau MA, Christensen BK, Hawley LL, Gemar MS, Segal ZV. Inhibitory deficits for  
8 negative information in persons with major depressive disorder. *Psychological*  
9  
10  
11  
12  
13 37. Joormann J, Gotlib IH. Updating the contents of working memory in depression:  
14 Interference from irrelevant negative material. *Journal of Abnormal Psychology*  
15  
16  
17  
18  
19  
20 38. Joormann J, Levens SM, Gotlib IH. Sticky thoughts: Depression and rumination are  
21 associated with difficulties manipulating emotional material in working memory.  
22  
23  
24  
25  
26 39. Zetsche U, D'Avanzato C, Joormann J. Depression and rumination: Relation to  
27 components of inhibition. *Cognition and Emotion* 2012;26(4):758-67.  
28  
29  
30  
31 40. Joormann J, Gotlib IH. Emotion regulation in depression: Relation to cognitive inhibition.  
32  
33  
34  
35 41. Gul A, Ahmad H. Cognitive deficits and emotion regulation strategies in patients with  
36 psychogenic nonepileptic seizures: A task-switching study. *Epilepsy & Behavior*  
37  
38  
39  
40  
41 42. Pe ML, Raes F, Koval P, Brans K, Verduyn P, Kuppens P. Interference resolution  
42 moderates the impact of rumination and reappraisal on affective experiences in daily  
43  
44  
45  
46  
47 43. Pe ML, Raes F, Kuppens P. The cognitive building blocks of emotion regulation: Ability  
48 to update working memory moderates the efficacy of rumination and reappraisal on  
49  
50  
51  
52  
53 44. Donaldson C, Lam D. Rumination, mood and social problem-solving in major depression.  
54  
55  
56  
57  
58  
59

- 1  
2  
3 45. Baer RA, Peters JR, Eisenlohr-Moul TA, Geiger PJ, Sauer SE. Emotion-related cognitive  
4  
5 processes in borderline personality disorder: A review of the empirical literature.  
6  
7 *Clinical Psychology Review* 2012;32(5):359-69.  
8
- 9 46. Epp AM, Dobson KS, Dozois DJ, Frewen PA. A systematic meta-analysis of the Stroop  
10  
11 task in depression. *Clinical Psychology Review* 2012;32(4):316-28.  
12
- 13 47. Wittchen H-U, Wunderlich U, Gruschwitz S, Zaudig M. *SKID-I - Strukturiertes*  
14  
15 *Klinisches Interview für DSM-IV. Achse I: Psychische Störungen. Interviewheft.*  
16  
17 Göttingen: Hogrefe, 1997.  
18
- 19 48. Fydrich T, Renneberg B, Schmitz B, Wittchen H-U, First MB, Benjamin L. *SKID-II:*  
20  
21 *strukturiertes klinisches Interview für DMS-IV; Achse II: Persönlichkeitsstörungen;*  
22  
23 *Interviewheft; eine deutschsprachige, erw. Bearb. der amer. Originalversion des*  
24  
25 *SKID-II von: Michael B. First et al. Göttingen: Hogrefe, 1997.*  
26  
27
- 28 49. Horn W. *L-P-S Leistungsprüfsystem*. Göttingen: Hogrefe, 1983.  
29
- 30 50. Beck AT, Steer RA, Brown GK. *Manual for the Beck Depression Inventory-II*. San  
31  
32 Antonio, TX: Psychological Corporation, 1996.  
33
- 34 51. Kühner C, Bürger C, Keller F, Hautzinger M. Reliabilität und Validität des revidierten  
35  
36 Beck-Depressionsinventars (BDI-II). *Nervenarzt* 2007;78(6):651-56.  
37  
38
- 39 52. Bohus M, Kleindienst N, Limberger MF, Stieglitz RD, Domsalla M, Chapman AL, et al.  
40  
41 The Short Version of the Borderline Symptom List (BSL-23): Development and Initial  
42  
43 Data on Psychometric Properties. *Psychopathology* 2009;42(1):32-39.  
44  
45
- 46 53. Derogatis LR. *SCL-90-R. Administration, scoring and procedures Manual-II (2nd ed.)*.  
47  
48 *Baltimore: Clinical Psychometric Research* 1983.  
49
- 50 54. Geisheim C, Hahlweg K, Fiegenbaum W, Frank M, Schröder B, von Witzleben I. Das  
51  
52 Brief Symptom Inventory (BSI) als Instrument zur Qualitätssicherung in der  
53  
54 Psychotherapie. *Diagnostica* 2002;48(1):28-36.  
55  
56  
57  
58  
59  
60

- 1  
2  
3 55. Huffziger S, Kühner C. Die Ruminationsfacetten Brooding und Reflection. *Zeitschrift für*  
4  
5 *klinische Psychologie und Psychotherapie* 2012.
- 6  
7 56. Watson D, Clark LA, Tellegen A. Development and validation of brief measures of  
8  
9 positive and negative affect: The PANAS scales. *Journal of Personality and Social*  
10  
11 *Psychology* 1988;54(6):1063-70.
- 12  
13 57. Stiglmayr C, Schmahl C, Bremner JD, Bohus M, Ebner-Priemer U. Development and  
14  
15 psychometric characteristics of the DSS-4 as a short instrument to assess dissociative  
16  
17 experience during neuropsychological experiments. *Psychopathology* 2009;42(6):370-  
18  
19 4.
- 20  
21  
22 58. Heijl JE, Cheavens JS. Back to basics: A naturalistic assessment of the experience and  
23  
24 regulation of emotion. *Emotion* 2014;14(5):878-91.
- 25  
26 59. Zhang JX, Leung HC, Johnson MK. Frontal activations associated with accessing and  
27  
28 evaluating information in working memory: an fMRI study. *Neuroimage*  
29  
30 2003;20(3):1531-39.
- 31  
32  
33 60. Võ ML, Conrad M, Kuchinke L, Urton K, Hofmann MJ, Jacobs AM. The Berlin affective  
34  
35 word list reloaded (BAWL-R). *Behavior research methods* 2009;41(2):534-38.
- 36  
37 61. Ecker UK, Lewandowsky S, Oberauer K. Removal of information from working memory:  
38  
39 A specific updating process. *Journal of Memory and Language* 2014;74:77-90.
- 40  
41  
42 62. Chang EP, Ecker UK, Page AC. Impaired memory updating associated with impaired  
43  
44 recall of negative words in dysphoric rumination—Evidence for a removal deficit.  
45  
46 *Behaviour Research and Therapy* 2017;93:22-28.
- 47  
48 63. Oei NYL, Tollenaar MS, Spinhoven P, Elzinga BM. Hydrocortisone reduces emotional  
49  
50 distracter interference in working memory. *Psychoneuroendocrinology*  
51  
52 2009;34(9):1284-93.
- 53  
54  
55  
56  
57  
58  
59

- 1  
2  
3 64. Lang PJ, Bradley MM, Cuthbert BN. International affective picture system (IAPS):  
4  
5 Affective ratings of pictures and instruction manual. Gainesville, FL: University of  
6  
7 Florida, 2008.  
8
- 9 65. Etkin A, Egner T, Peraza DM, Kandel ER, Hirsch J. Resolving emotional conflict: a role  
10  
11 for the rostral anterior cingulate cortex in modulating activity in the amygdala. *Neuron*  
12  
13 2006;51(6):871-82.  
14
- 15 66. Etkin A, Prater KE, Hoeft F, Menon V, Schatzberg AF. Failure of anterior cingulate  
16  
17 activation and connectivity with the amygdala during implicit regulation of emotional  
18  
19 processing in generalized anxiety disorder. *American Journal of Psychiatry*  
20  
21 2010;167(5):545-54.  
22  
23
- 24 67. Ekman P. Pictures of facial affect. *Consulting Psychologists Press* 1976.  
25
- 26 68. Hey S, Anastasopoulou P, von Haaren B. Erfassung körperlicher Aktivität mittels  
27  
28 Akzelerometrie–Möglichkeiten und Grenzen aus technischer Sicht. *B&G*  
29  
30 *Bewegungstherapie und Gesundheitssport* 2014;30(02):73-78.  
31
- 32 69. Eid M, Gollwitzer M, Schmitt M. *Statistik und Forschungsmethoden* Weinheim: Beltz  
33  
34 PVU, 2013.  
35
- 36 70. Koval P, Pe ML, Meers K, Kuppens P. Affect dynamics in relation to depressive  
37  
38 symptoms: Variable, unstable or inert? *Emotion* 2013;13(6):1132.  
39
- 40 71. Ebner-Priemer U, Eid M, Kleindienst N, Stabenow S, Trull TJ. Analytic strategies for  
41  
42 understanding affective (in) stability and other dynamic processes in psychopathology.  
43  
44 *Journal of Abnormal Psychology* 2009;118(1):195.  
45  
46  
47  
48  
49  
50  
51  
52  
53  
54  
55  
56  
57  
58  
59  
60



1  
2  
3  
4  
5  
6  
7  
8  
9  
10  
11  
12  
13  
14  
15  
16  
17  
18  
19  
20  
21  
22  
23  
24  
25  
26  
27  
28  
29  
30  
31  
32  
33  
34  
35  
36  
37  
38  
39  
40  
41  
42  
43  
44  
45  
46  
47  
48  
49  
50  
51  
52  
53  
54  
55  
56  
57  
58  
59  
60

**Figures**

*Figure 1.* Procedure of the research project

For peer review only

## Acknowledgements

### Funding

Funding for this study was provided by grants from the German Research Foundation (DFG-ZE 1029/2-1 to UZ and DFG-SCHU 2961/2-1 to LS).

### Conflict of Interests

All authors declare that there are no conflicts of interest.

### Contributorship Statement

Lars Schulze and Ulrike Zetsche designed the study, wrote the funding grant, and drafted and revised the current manuscript. Paul Christian Bürkner was responsible for the data analytic plan, wrote the section data analysis, and revised the current manuscript. Julian Bohländer piloted the Removal and Updating task, coordinates the data assessment, and wrote and revised the current manuscript.

1  
2  
3  
4  
5  
6  
7  
8  
9  
10  
11  
12  
13  
14  
15  
16  
17  
18  
19  
20  
21  
22  
23  
24  
25  
26  
27  
28  
29  
30  
31  
32  
33  
34  
35  
36  
37  
38  
39  
40  
41  
42  
43  
44  
45  
46  
47  
48  
49  
50  
51  
52  
53  
54  
55  
56  
57  
58  
59  
60

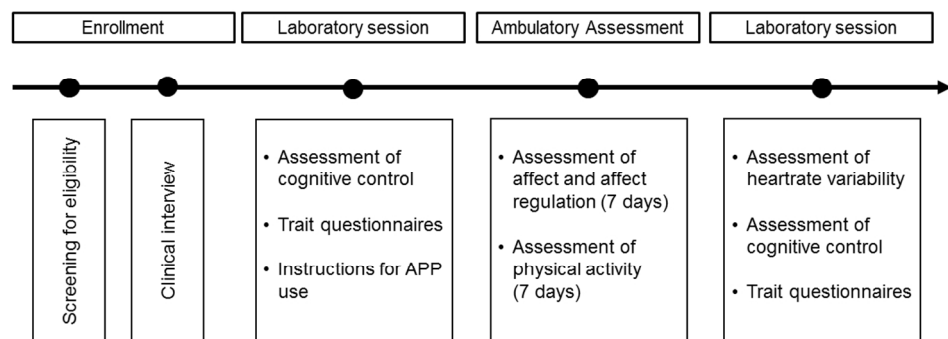

Figure 1. Procedure of the research project

338x190mm (96 x 96 DPI)

Review only

# BMJ Open

## Cognitive control and daily affect regulation in major depression and borderline personality disorder: protocol for an experimental ambulatory assessment study in Berlin, Germany

|                                 |                                                                                                                                                                                                                                                                                                                                     |
|---------------------------------|-------------------------------------------------------------------------------------------------------------------------------------------------------------------------------------------------------------------------------------------------------------------------------------------------------------------------------------|
| Journal:                        | <i>BMJ Open</i>                                                                                                                                                                                                                                                                                                                     |
| Manuscript ID                   | bmjopen-2018-022694.R1                                                                                                                                                                                                                                                                                                              |
| Article Type:                   | Protocol                                                                                                                                                                                                                                                                                                                            |
| Date Submitted by the Author:   | 22-Jun-2018                                                                                                                                                                                                                                                                                                                         |
| Complete List of Authors:       | Schulze, Lars; Freie Universität Berlin, Clinical psychology and psychotherapy<br>Burkner, Paul; Westfaelische Wilhlems-Universitaet Muenster, Statistics<br>Bohlander, Julian; Freie Universität Berlin, Clinical psychology and psychotherapy<br>Zetsche, Ulrike; Freie Universität Berlin, Clinical psychology and psychotherapy |
| <b>Primary Subject Heading</b>: | Mental health                                                                                                                                                                                                                                                                                                                       |
| Secondary Subject Heading:      | Mental health                                                                                                                                                                                                                                                                                                                       |
| Keywords:                       | affect regulation, cognitive control, major depression, borderline personality disorder, discarding, ambulatory assessment                                                                                                                                                                                                          |
|                                 |                                                                                                                                                                                                                                                                                                                                     |

SCHOLARONE™  
Manuscripts

Word count: 5933

**Cognitive control and daily affect regulation in major depression and borderline  
personality disorder: protocol for an experimental ambulatory assessment study in  
Berlin, Germany**

Lars Schulze<sup>1</sup>, Paul-Christian Bürkner<sup>2</sup>, Julian Bohländer<sup>1</sup>, Ulrike Zetsche\*<sup>1</sup>

1 Freie Universität Berlin, Department of Clinical Psychology and Psychotherapy, Berlin,  
Germany

2 University of Münster, Department of Statistics, Faculty of Psychology, Münster, Germany

\* Corresponding author. Ulrike Zetsche, Freie Universität Berlin, Department of Clinical  
Psychology and Psychotherapy, Habelschwerdter Allee 45, 14195 Berlin, Germany, phone:  
+49-30-838 55925; fax: +49-30-838 4 55925; [u.zetsche@fu-berlin.de](mailto:u.zetsche@fu-berlin.de)

**ABSTRACT**

**Introduction:** Affective disturbances and difficulty in affect regulation are core features of major depressive disorder (MDD) as well as borderline personality disorder (BPD). Whereas depressed individuals are characterized by affective inertia, individuals with BPD are characterized by affective instability. With regard to affect regulation, both groups have been found to use more maladaptive strategies, such as rumination or suppression, compared to healthy controls. Individuals with MDD or BPD might also employ adaptive regulation strategies (e.g., reappraisal) less *effectively* than healthy controls. Surprisingly, however, there have been hardly any studies directly comparing these two disorders to disentangle shared and disorder-specific deficits in affective dynamics and affect regulation.

Furthermore, theoretical models link deficits in affect regulation to deficits cognitive control functions. Given that individuals with MDD or BPD are both characterized by impairments in cognitive control, it will be intriguing to examine whether such impairments might explain their difficulty in affect regulation. The aim of the present study is thus to investigate the link between individual differences in cognitive control and disturbances in affect dynamics and regulation in the daily life of individuals with MDD or BPD.

**Methods and Analyses:** We will use a smartphone application to assess negative and positive affect as well as affect regulation strategies at eight times a day for seven days. We will further employ four computerized tasks to assess two cognitive control functions, namely interference control and discarding irrelevant information from working memory. Our hypotheses will be tested using a multi-method approach. Power analyses determined a sample size of 159 (53 MDD, 53 BPD, 53 Controls) to detect medium effect sizes.

**Ethics and Dissemination:** Ethics approval has been obtained from the Freie Universität Berlin. Data collection started in 01/2017 and will last till the end of 2018.

1  
2  
3 **Keywords:** Affect regulation, cognitive control, major depression, borderline personality  
4 disorder, interference control, discarding, ambulatory assessment  
5  
6  
7  
8  
9  
10

### 11 **Strengths and limitations of this study**

- 13 • Real-time assessment of affect dynamics and affect regulation in daily life
- 14
- 15 • Assessing two prominent affective disorders (BPD and MDD) and a control group
- 16
- 17
- 18 • Linking the use and effectiveness of affect regulation strategies to individual
- 19 differences in cognitive control functions (i.e. discarding of previously relevant
- 20 information, interference control)
- 21
- 22
- 23
- 24 • Limitations: Cross-sectional design, mainly self-report measures of affect regulation
- 25
- 26
- 27
- 28
- 29
- 30
- 31
- 32
- 33
- 34
- 35
- 36
- 37
- 38
- 39
- 40
- 41
- 42
- 43
- 44
- 45
- 46
- 47
- 48
- 49
- 50
- 51
- 52
- 53
- 54
- 55
- 56
- 57
- 58
- 59
- 60

## INTRODUCTION

Affective disturbances are common among most mental disorders. In search of causes for these affective disturbances, impairments in the regulation of affective states have become a major interest in clinical psychology. The most prominent and generalized impairments in affect regulation (AR) are found in individuals with major depressive disorder (MDD) or borderline personality disorder (BPD)<sup>1 2</sup>. Although there is growing research examining abnormalities in the use and effectiveness of AR strategies, hardly any study has directly compared these two disorders to disentangle shared and disorder-specific deficits in affect regulation. In addition, theoretical models have linked effective AR to cognitive control functions, for reviews see<sup>3 4</sup>. Identification of abnormalities in affect regulation and its underlying cognitive mechanisms thus represents an important step in developing interventions to address deficits in affect regulation in these disorders.

The following paragraphs give an overview of previous findings on the use and effect of the three most researched AR strategies, i.e. rumination, suppression, and reappraisal in MDD and BPD, while highlighting important questions that have as yet remained unanswered.

### **Affect regulation in depression**

Affective disturbances in depression are characterized by both the experience of sustained negative affect (i.e., affective inertia,<sup>5</sup>) as well as difficulty experiencing positive affect<sup>6</sup>. To gain a better understanding of these affective disturbances, recent research has focused on the way depressed individuals attempt to regulate their affect. Results revealed that depressed individuals as compared to healthy controls show a greater use of putatively maladaptive affect regulation strategies, for a review, see<sup>7</sup>. In this context, rumination has been identified as a particularly detrimental response to negative affect<sup>2</sup>. Rumination involves recurrent negative thoughts focused on one's depressive symptoms and the causes, meaning, and



1  
2  
3 consequences of these symptoms<sup>8</sup>. Rumination in response to negative affect has been shown  
4  
5 to intensify negative affect, increase negative memory recall, impair social problem solving,  
6  
7 and ultimately enhance the risk for the onset of new depressive episodes, for a review, see<sup>9</sup>.  
8  
9 Another maladaptive regulation strategy that has been linked to depression is the suppression  
10  
11 of one's affect. Currently depressed as well as remitted depressed individuals have been found  
12  
13 to suppress their affective response to a greater degree than non-depressed individuals<sup>7 10</sup>.  
14  
15 Although intended to reduce negative affect, suppression has been found to increase negative  
16  
17 affect<sup>10 11</sup>. On the other hand, evidence also suggests that depressed individuals are less likely  
18  
19 to use AR strategies that are beneficial in healthy individuals<sup>12</sup>. Cognitive reappraisal has  
20  
21 been shown to be a particularly effective means of AR<sup>13</sup>. Reappraisal involves changing the  
22  
23 meaning of a situation in order to alter the affect that follows<sup>14</sup>. In a recent meta-analysis,  
24  
25 decreased habitual use of reappraisal has been associated with depressive symptoms<sup>7</sup>. Thus,  
26  
27 evidence suggests that depression is associated with more frequent use of maladaptive AR  
28  
29 strategies, such as rumination or suppression, and less frequent use of adaptive strategies,  
30  
31 such as reappraisal. Please note that all hypotheses of the present project focus on these three  
32  
33 most-researched AR strategies (i.e., rumination, suppression, reappraisal). When examining  
34  
35 group differences in the use of specific AR strategies, however, it is important to control for  
36  
37 overall AR strategy use<sup>15</sup>. For this purpose, we also assess other widely used strategies,  
38  
39 namely distraction, acceptance, and social sharing. Whereas findings on the association  
40  
41 between distraction and depression are inconclusive<sup>2</sup>, there are hardly any studies on the  
42  
43 association of acceptance or social sharing and depression. Thus, we do not formulate any  
44  
45 specific hypotheses regarding these AR strategies.  
46  
47  
48  
49

50  
51 In addition, there is evidence suggesting that depressed individuals are not able to  
52  
53 employ putatively adaptive AR strategies as effectively as healthy individuals. Joormann and  
54  
55 colleagues, for example, demonstrated that currently depressed compared to healthy  
56  
57 individuals were not able to use positive memories to repair a negative affective state<sup>16</sup>.  
58  
59

Further research found that higher levels of depressive symptoms were associated with lower reappraisal ability under high levels of stress<sup>17</sup>. Thus, strategies that are effective in regulating negative affect in healthy individuals may not be as effective in the regulation of negative affect in currently depressed individuals.

### **Affect regulation in borderline personality disorder**

The affective disturbance that is "at the core of borderline pathology"<sup>18</sup> is a pronounced instability of emotions<sup>19</sup>. Pivotal to the understanding of this pronounced instability are abnormalities in the processing and regulation of affective responses<sup>20 21</sup>.

Regarding affect regulation, evidence suggests a more pronounced use of affect suppression in BPD<sup>22 23</sup>. In addition, heightened levels of rumination have been reported in BPD as compared to healthy individuals<sup>24 25</sup>. Students with pronounced traits of borderline personality demonstrate a generally increased use of adaptive as well as maladaptive AR strategies to regulate affective states<sup>26</sup>.

Only recently, studies have begun to examine the effectiveness of AR strategies in BPD. In contrast to findings in healthy individuals and patients with MDD, the suppression of affective responses was found to decrease negative affect and to attenuate impulsive behavior<sup>27</sup>. Recent findings provided further support that affect suppression may have an adaptive function in BPD<sup>28</sup>. In addition, findings suggest that individuals with BPD as compared to healthy controls use cognitive reappraisal less efficiently to attenuate negative affect<sup>29 30</sup>. This might be due to difficulties in the generation and implementation of alternative appraisals of affect-generating stimuli<sup>20</sup>.

### **Affect regulation and cognitive control deficits**

The mechanisms underlying impairments in effective affect regulation are not yet well researched. Several researchers have suggested that cognitive control functions play an

1  
2  
3 important role in effective affect regulation<sup>34</sup>. Affective states are associated with the  
4 activation of affect congruent cognitions in working memory. The ability to control affective  
5 contents in working memory may thus be essential for effective affect regulation. It is  
6  
7 important to note, that cognitive control is not a unitary construct but consists of several  
8  
9 components, such as response inhibition, discarding of no longer relevant material from  
10  
11 working memory, or interference control (i.e. resistance to distractor interference)<sup>31 32</sup>.  
12  
13  
14

15  
16 Impairments in cognitive control have been generally linked to both BPD<sup>33-36</sup> and  
17 depression symptoms<sup>37-40</sup>. Importantly, impairments in cognitive control have also been  
18 directly linked to disturbances in affect regulation: more frequent *use* of rumination has been  
19 related to difficulty discarding no longer relevant material from working memory<sup>41</sup>, whereas  
20 more frequent use of suppression has been linked to impairments in interference control of  
21 negative material<sup>42</sup>. In addition, less frequent use of reappraisal may be related to difficulty in  
22 interference control<sup>42 43</sup>.  
23  
24  
25  
26  
27  
28  
29  
30

31 Fewer studies have assessed the role cognitive control plays in the *effectiveness* of AR  
32 strategies. First evidence implies that deficits in the ability to discard previously relevant  
33 information from working memory confine the benefits of reappraisal and increase the  
34 detrimental effects of rumination<sup>15 44</sup>. However, this has not yet been assessed in a clinical  
35 sample. It will therefore be crucial to examine the link between differences in the cognitive  
36 control of affective material and the effectiveness of daily affect regulation in clinical  
37 samples.  
38  
39  
40  
41  
42  
43  
44  
45  
46  
47

### 48 **Research questions and hypotheses**

49  
50 The present project combines the assessment of daily affective dynamics, daily affect  
51 regulation strategies, and cognitive control abilities in individuals with MDD, individuals with  
52 BPD, and healthy controls. This design is a compelling framework to examine the following  
53 research questions:  
54  
55  
56  
57  
58  
59  
60

### 1. Affective Dynamics

*Research Question:* Do healthy controls, individuals with MDD, and individuals with BPD differ in their affective dynamics (i.e., affective inertia, affective instability) in daily life?

*Hypotheses:* We expect a main effect of group on each measure of affect dynamics.

Specifically, we expect that individuals with BPD show more affective instability than individuals with MDD or healthy controls, when controlling for affective variability<sup>5</sup>.

Further, we expect that individuals with MDD or BPD show higher affective variability than healthy controls, even after controlling for inertia. Finally, we expect that individuals with BPD show less affective inertia than individuals with MDD or healthy controls, when controlling for affective variability.

### 2. Use of affect regulation strategies

*Research Question:* Do healthy controls, individuals with MDD, and individuals with BPD differ in their habitual use of different affect regulation strategies?

*Hypotheses:* First, we expect a main effect of group on general intensity of affect regulation.

That is, we expect that individuals with BPD or MDD generally employ affect regulation strategies more often than healthy controls. Second, we expect an interaction between group and kind of strategy<sup>7 22 24 26</sup>. That is, we expect that individuals with BPD or MDD select rumination or suppression more often than reappraisal. In contrast, we expect that healthy controls select reappraisal more often than rumination or suppression.

### 3. Effect of affect regulation strategies on affect

*Research Questions:* Does the effectiveness of affect regulation strategies differ between healthy controls, individuals with MDD, and individuals with BPD?

1  
2  
3 *Hypotheses:* We expect an interaction effect between group and kind of strategy on affect  
4 ratings. Specifically, we expect that **rumination** intensity assessed as time t will be associated  
5 with higher negative affect at time t when controlling for negative affect at t-1 in individuals  
6 with MDD or BPD than in healthy controls<sup>45 46</sup>. Note, that rumination assessed at time t  
7 reflects the intensity in the interval between time t-1 and time t.  
8  
9

10  
11  
12  
13 The intensity of **suppression** assessed at time t will be associated with lower negative  
14 affect at time t when controlling for negative affect at t-1 in individuals with BPD<sup>26 28</sup>, but not  
15 in individuals with MDD and healthy controls<sup>10 11</sup>.  
16  
17

18  
19  
20 The intensity of **reappraisal** assessed at time t will be associated with more negative  
21 affect at time t when controlling for negative affect at t-1 in individuals with BPD or MDD as  
22 compared to healthy controls<sup>17 20 29</sup>.  
23  
24  
25  
26  
27

#### 28 29 4. Group differences in cognitive control

30  
31 *Research Question:* Do healthy controls, individuals with MDD, and individuals with BPD  
32 differ in their ability to control affective material in working memory?  
33  
34

35 *Hypotheses:* We expect an interaction effect between group and experimental condition on  
36 response latencies. Specifically, we expect that individuals with MDD or BPD as compared to  
37 healthy controls show impairments in **interference control** of affective stimuli, reflected in  
38 slower response latencies in experimental as compared to control trials<sup>34 47</sup>.  
39  
40  
41  
42

43  
44 Similarly, we expect that individuals with MDD as compared to healthy controls show  
45 impairments in **discarding** no longer relevant negative material from working memory,  
46 reflected in slower response latencies in experimental as compared to control trials<sup>38</sup>.  
47  
48  
49  
50

#### 51 52 5. Cognitive control and affect regulation

53  
54 *Research question:* Are impairments in cognitive control functions related to differences in  
55 the use or effectiveness of affect regulation strategies?  
56  
57  
58  
59

1  
2  
3        *Hypotheses:* We expect an interaction between the respective cognitive control index  
4 and kind of strategy on intensity ratings (i.e., strategy use). That is, we expect that individual  
5 differences in **discarding** affective material from working memory will be negatively  
6  
7 associated with more frequent use of rumination<sup>38 41 42</sup>.

8  
9  
10  
11        In addition, we expect that individual differences in **interference control** will be  
12 negatively associated with using suppression and positively associated with using reappraisal  
13  
14  
15  
16<sup>38</sup>.

17  
18        We further expect an interaction between the respective cognitive control index and  
19 kind of strategy on negative affect ratings at time t. That is, we expect that individual  
20 differences in **discarding** affective material from working memory when using rumination  
21 will be associated with higher negative affect at time t when controlling for negative affect at  
22 time t-1<sup>15 44</sup>. Further, we expect that individual differences in discarding affective material  
23 from working memory when using reappraisal will be associated with less negative affect at  
24 time t when controlling for negative affect at time t-1<sup>15 44</sup>.

25  
26  
27  
28  
29  
30  
31  
32  
33  
34  
35 Note, that the number of studies directly comparing individuals with MDD and BPD  
36 regarding affective dynamics, affect regulation strategies, or cognitive control abilities is very  
37 limited. Thus, the literature only allows to formulate specific hypotheses on differences  
38 between the clinical groups and the control group. It will be intriguing to examine differences  
39 and similarities between individuals with MDD and individuals with BPD in the assessed  
40 variables.  
41  
42  
43  
44  
45  
46  
47  
48  
49

## 50 6. Additional research questions

51  
52 The present research project allows to investigate several additional research questions that  
53 will be presented below:  
54  
55

1  
2  
3           *Heart rate variability and affect regulation:* Thayer and Lane<sup>48</sup> proposed that heart  
4 rate variability reflects a psychophysiological index of affect regulation capacity. Indeed  
5 several studies illustrated that individuals with low resting vagally-mediated heart rate  
6 variability (vmHRV) have difficulties with affect regulation<sup>49 50</sup>. Accordingly, lower HRV  
7 has been reported for individuals with BPD and MDD<sup>51 52</sup>, but to date no study directly  
8 assessed the role of vmHRV on affective dynamics or affect regulation. In this study, we  
9 include a resting-state assessment of HRV to examine this question.  
10  
11  
12  
13  
14  
15  
16

17           *Physical activity:* There is considerable evidence that people feel better after being  
18 physically active<sup>53</sup>. However, these findings are almost entirely based on interventional,  
19 between-person designs. Hence, it is unclear whether these findings translate into daily life. It  
20 will thus be interesting to examine the associations between daily physical activity and daily  
21 affective states<sup>54</sup>. For these reasons, participants of our study are asked to wear an  
22 accelerometer during the ambulatory assessment phase.  
23  
24  
25  
26  
27  
28  
29

30           *Expectation and recall biases of affective states:* Depressive symptoms are associated  
31 with pronounced biases in the expectation and recall of affective states<sup>55</sup>. Notably, such  
32 biases also affect the choice and implementation of emotion regulation strategies<sup>56 57</sup>. These  
33 processes, however, have been primarily investigated in non-clinical samples. In this study,  
34 depressed individuals and individuals with BPD are asked to predict their average affect,  
35 sleep, and affect regulation before the ambulatory assessment phase. After the ambulatory  
36 assessment phase, they have to recall their average weekly affect, sleep, and affect  
37 regulation.”  
38  
39  
40  
41  
42  
43  
44  
45  
46  
47  
48  
49  
50  
51  
52  
53  
54  
55  
56  
57  
58  
59  
60

## METHODS AND ANALYSES

### Participants

The present research project includes three groups of participants: individuals with BPD, individuals with current MDD, and healthy control participants. The sample size is targeted at 53 participants per group (for details see power analysis).

#### General inclusion and exclusion criteria

Participants will be between age 18 and 65 years and speak German as their native language (due to verbal demands in the experimental tasks). Participants need to provide written informed consent for participation in the study. Participants will be excluded if they

- are pregnant,
- report of severe head trauma or any known neurological diseases,
- report any past or present psychotic symptoms,
- meet criteria for bipolar disorder or any psychotic disorder,
- meet criteria for substance dependency within the last 12 months

Patients taking psychotropic medication will not be excluded. However, there must be no change in medication for at least four weeks prior to as well as during the entire assessment period. Medication type and dose will be assessed. In-patients will not be included in the study.

#### Major Depressive Disorder (MDD) group

Participants included in the MDD group will meet Diagnostic and Statistical Manual of Mental Disorders (DSM-IV) criteria for a current major depressive episode. The duration of the current episode as well as the number of past episodes will be assessed but won't be decisive for inclusion into the study. Due to high rates of comorbidity among MDD and other



mood and anxiety disorders, individuals with a comorbid mood (except bipolar disorders) or anxiety disorder will be included. Depressed individuals meeting more than two DSM-IV criteria for BPD will be excluded.

#### Borderline personality disorder (BPD) group

Participants included in the BPD group will meet DSM-IV criteria for borderline personality disorder. Due to high rates of Axis-I and Axis-II comorbidity in BPD presence of comorbid disorders will be allowed for study inclusion with the exception of a current major depressive episode, substance dependency within the last 12 months, bipolar or psychotic disorders. To control for the influence of total symptom severity, all analyses on group differences in affect regulation or cognitive control will be repeated including the Brief Symptom Inventory (BSI) total score as a covariate.

#### Healthy control group

Participants included in the healthy control group have to be free of any past or present mental disorder according to DSM-IV criteria. The absence of any mental disorder will be confirmed by Structured Clinical Interview for DSM (SCID-I) and SCID-II interviews. Participants in the control group will be free of any psychotropic medication. Furthermore, control participants will be excluded if they meet more than two DSM-IV criteria for BPD or any of the two cardinal DSM-IV criteria for MDD.

#### Recruitment

Individuals with MDD or BPD will be recruited through advertisements posted at cooperating counseling institutions, various sites within the community, and in online newspapers.

Healthy control participants will be recruited through postings at various sites within the community and in online newspapers.

1  
2  
3 In addition, depressed participants will be recruited from the local outpatient clinic at  
4 Freie Universität Berlin (Head: Prof. Dr. Babette Renneberg). Participants with BPD will also  
5 be recruited at the Department for Psychiatry and Psychotherapy at Charité Berlin (Head:  
6  
7 Prof. Dr. Stefan Röpke).  
8  
9

### 10 11 12 13 **Assessment of psychopathology**

14  
15 All participants will be interviewed using the Structured Clinical Interview for DSM-IV Axis-  
16 I<sup>58</sup> and Axis-II disorders<sup>59</sup>. Diagnostic interviews will be conducted by trained interviewers.  
17  
18

19  
20 The following instruments will assess disorder-specific and general psychopathology:  
21  
22 The Beck Depression Inventory II (BDI-II)<sup>60 61</sup>; the Borderline Symptom List (BSL-23)<sup>62</sup>;  
23 the Brief Symptom Inventory (BSI)<sup>63 64</sup>; the German version of the 10-item Response Style  
24 Questionnaire (RSQ)<sup>65</sup>. Finally the German version of the Positive and Negative Affect  
25 Schedule (PANAS)<sup>66</sup> as well as the Dissociative Tension Scale (DSS-4)<sup>67</sup> will be used to  
26 assess mood fluctuations and dissociative states in the laboratory sessions.  
27  
28  
29  
30  
31

32  
33 In addition, all individuals with BPD or MDD will be asked about any current and/or  
34 past psychotherapy.  
35  
36  
37  
38

### 39 40 **Ambulatory assessment of daily affect and affect regulation**

41 All participants receive a smartphone including an App for ambulatory assessment.  
42  
43 Participants will be instructed to go on with their daily activities and respond to several  
44 questions when indicated by a beep. The Smartphone App will be individually programmed to  
45 beep 8 times a day for 7 consecutive days with the daily sampling period comprising 12  
46 hours. The sampling period will be divided into 8 time blocks of equal length and the auditory  
47 signal will occur pseudo-randomly within each time block, with a minimum of 1h between  
48 beeps<sup>15</sup>. Responses will be time-stamped by the software.  
49  
50  
51  
52  
53  
54  
55  
56  
57  
58  
59  
60

1  
2  
3 Following each prompt, participants will indicate on a scale from 1 (not at all) to 7  
4 (very much) how angry, anxious, ashamed, cheerful, depressed, happy, and tense they feel  
5 (i.e. 'How did you feel just before the beep?'). To examine whether groups differ in the  
6 frequency may have problems in correctly identifying specific negative emotions, only the  
7 average score across all negative affect ratings (i.e., angry, anxious, ashamed, depressed,  
8 tense) will be used. Next, participants will be asked to indicate on a scale from 1 (not at all) to  
9 7 (very much) how much they used the following strategies since the last beep: rumination ('I  
10 thought over and over again about a situation or my feelings'; 'How negative were these  
11 thoughts?'), suppression ('I controlled my emotion by not showing them'), reappraisal (I have  
12 thought about the situation in a different way.'). To control for overall degree of AR strategy  
13 use<sup>26</sup>, participants are also asked about the implementation of other widely used or disorder-  
14 relevant AR strategies<sup>18 68</sup>. These are acceptance ('I accepted the situation and/or my  
15 situation'), distraction ('I found an activity to keep myself busy and distracted'), and social  
16 sharing ('I found someone to talk to about my feelings'). In addition, individuals with a  
17 history of self-injurious behavior will be asked how much they felt an urge to injure  
18 themselves. At the first daily beep, all participants will be asked to indicate on a scale from 1  
19 (not at all) to 7 (very well) how well they slept last night.

20  
21  
22  
23  
24  
25  
26  
27  
28  
29  
30  
31  
32  
33  
34  
35  
36  
37  
38  
39 Participants will receive an extra incentive for responding to more than 90% of beeps.  
40  
41  
42  
43

#### 44 **Assessment of cognitive control**

##### 45 46 47 48 1. Discarding of no longer relevant information from working memory

##### 49 *Working Memory Selection Task (WMST)*

50  
51  
52 The WMST assesses the ability to discard no longer relevant affective information from  
53 working memory<sup>38</sup>.  
54  
55  
56  
57  
58  
59  
60

Each trial of the WMST consists of three consecutive displays: a learning display, a cue display, and a probe display. On the learning display, participants are presented with two rows of three words each, one row printed in red and the other row printed in blue.

Participants are instructed to memorize all six words. On the following cue display, a red or blue frame is presented indicating which row of words will be relevant for the upcoming response. Participants are instructed to keep only the relevant set in mind and disregard the other three words. Finally, on the probe display, a probe word is presented and participants are asked to decide whether or not the probe is from the relevant word set.

The probe may either be a word from the relevant word set (relevant probe), a word that participants had to learn but were then asked to forget (suppress probe), or a new word that had not been presented before (novel probe). Thus, participants have to reject both suppress probes and novel probes. It has been shown that participants take longer to reject a suppress probe compared to a novel probe<sup>69</sup> and it has been suggested that this difference in reaction times reflects the residual activation of the no-longer-relevant suppress word. Thus, the ability to discard no longer relevant material from working memory is measured by reaction times (RT) to suppress probes compared to novel probes. In the present version of the task, on critical trials, the red and blue rows of words include either only positive or only negative words, and the two rows always differ in valence. Thus, here we will compare the ability to discard irrelevant negative or positive information, respectively. All word stimuli are taken from the Berlin Affective Word List Reloaded (BAWL-R)<sup>70</sup>.

#### *Removal and Updating Task (RUT)*

The Removal and Updating Task is based on a letter updating task<sup>71</sup> adapted by Chang, Ecker & Page<sup>72</sup>. It measures the ability to remove no longer relevant affective contents from working memory (WM).

1  
2  
3 Each trial begins with the presentation of three words in three frames for 3000 ms and  
4 participant are asked to memorize the words. Next, the words disappear and a variable  
5 number of updating steps follows. At each updating step, one of the three words is cued for  
6 removal, indicated by the respective frame turning into red color. Then, a new word is  
7 presented in the cued frame and participants are asked to replace in mind the memorized word  
8 with the new word. Participants indicate the completion of their updating process by key-  
9 press. The reaction time between the presentation of the new word and participants' key-press  
10 serves as dependent variable.  
11  
12  
13  
14  
15  
16  
17  
18

19  
20 Importantly, the time between the removal cue and the presentation of the new word is  
21 varied ("cue-target-interval", CTI). In long CTI conditions (1500ms), the CTI allows for a  
22 complete removal process, so that the reaction time between the presentation of the new word  
23 and participants' key press only reflects the encoding of the new word. In the short CTI  
24 condition (200ms), the CTI does not allow for a complete removal process, so that the  
25 reaction time reflects the removal process and the encoding of the new word. Thus, the  
26 measure of an individual's removal speed is the comparison between RTs in trials with short  
27 and long CTI. Indices reflecting the removal of negative or positive words can be computed.  
28  
29  
30  
31  
32  
33  
34  
35  
36  
37 All word stimuli are taken from the BAWL-R.  
38

39  
40 To control for general updating ability, participants also complete a neutral version of  
41 the removal and updating task<sup>71</sup> including letters instead of words.  
42  
43  
44  
45

## 46 2. Interference Control

### 47 *Delayed working memory paradigm*

48  
49 This paradigm measures the ability to control interference from affectively distracting stimuli  
50 during working memory performance<sup>73</sup>.  
51  
52  
53

54  
55 On each trial, six capital letters are presented for 1500ms and participants are asked to  
56 memorize them. The presentation of the letters is followed by a delay period of 2000 ms, and  
57  
58  
59

1  
2  
3 the presentation of another single letter. Participants have to decide whether or not the single  
4  
5 letter was part of the initial block of letters. During the delay period, participants are either  
6  
7 presented with a blank screen, a neutral or a negative picture. All picture stimuli are taken  
8  
9 from the International Affective Picture System (IAPS)<sup>74</sup>. Neutral and negative IAPS stimuli  
10  
11 are matched for social content and perceptual complexity.  
12

13  
14 The ability to control interference from irrelevant information will be examined by  
15  
16 comparing response latencies between blank screens, neutral, and negative stimuli presented  
17  
18 in the delay period.  
19  
20

### 21 22 *Stroop Paradigm*

23  
24 The Stroop task is based on a paradigm by Etkin and colleagues<sup>75 76</sup> and measures the ability  
25  
26 to control interference from simultaneously presented irrelevant information.  
27

28  
29 Each trial consists of the presentation of a happy or an angry facial expression with the  
30  
31 word “Anger” or “Happiness” printed across the facial expression. Participants are asked to  
32  
33 ignore the words and to indicate by button press whether the face picture displays an angry or  
34  
35 happy facial expression. Facial expressions and words are either congruent or incongruent.  
36  
37 Each picture/word combination is presented for 1000 ms. All facial expressions are taken  
38  
39 from the original Ekman faces set<sup>77</sup>.  
40

41  
42 The ability to control interference from irrelevant information is assessed by the  
43  
44 classical behavioral interference effect (i.e. response latencies to incongruent trials as  
45  
46 compared to response latencies to congruent trials). In addition, trials can be classified based  
47  
48 on the congruence of the previous trial: congruent trial following a congruent trial (cC),  
49  
50 incongruent trial following a congruent trail (cI), congruent trial following an incongruent  
51  
52 trial (iC), and incongruent trial following an incongruent trial (iI).  
53  
54

### 55 56 57 **Additional Measures**

### Prediction and Recall of affect, sleep, and affect regulation strategies

In the first laboratory session, participants will be presented with all items from the ambulatory assessment (e.g., affect, affect regulation strategies, sleep) and asked to indicate on a scale from 0 (not at all) to 7 (very much) how much they expect to feel or behave this way (on average) during the following seven days. At the end of the ambulatory assessment period, participants will be presented with all items from the ambulatory assessment again and asked to indicate on a scale from 0 (not at all) to 7 (very much) how much they had felt or behaved this way (on average) during the past seven days.

### Intelligence

Participants' intelligence will be estimated by assessing the subtest 4 of the Leistungsprüfsystem (LPS-4)<sup>78</sup>. This serves to control for group differences in basic cognitive capabilities when examining group differences in cognitive control.

### Electrocardiogram

At the end of the second laboratory session, participants will be asked to put on an ECG chest belt to measure their resting state heart rate variability for a 5-minute period. Participants are asked to relax during the ECG assessment.

### Movement

During the seven-day ambulatory assessment period, participants will be asked to wear an accelerometer attached to their hips. The accelerometer continuously assesses data regarding participants' acceleration in all three geometric axes, context temperature, and air pressure<sup>79</sup>. This will allow to examine individual levels of physical activity and energy expenditure during the ambulatory assessment period.

## Procedures

The procedure of this project is depicted in Figure 1. Data collection started in 01/2017 and will last till the end of 2018.

## Sample size determination

### Power analysis for group differences in cognitive control

Previous studies examining impairments in valence-dependent cognitive control in depressed compared to control participants yielded medium between group effect sizes (WMST task: e.g.,  $d=0.78$ )<sup>38</sup>. Similar effect sizes were obtained for group differences in valence-dependent cognitive control between individuals with BPD and healthy controls (interference control: e.g.,  $d=0.89$ )<sup>34</sup>. To detect medium sized group differences in cognitive control functions using univariate ANOVAs, a total sample size of  $N=159$  ( $N=53$  per group) is needed as determined using G\*Power (assuming  $\alpha=.05$ , power of .8). For selected post-hoc group comparisons, a group size of  $N=51$  is required (assuming  $\alpha=.05$ , power of .8, allocation ratio = 1). Note, that we will use multi-level modeling to test group differences in cognitive control. Given that multi-level modeling includes several assessment points per individual, the intended sample size of  $N=159$  will be more than sufficient to detect medium sized group differences in cognitive control using multi-level modeling.

### Power analysis for ambulatory assessment data

A sample size of  $N=159$  that is required for the experimental part of the study is also large enough to ensure appropriate power for analyzing the ambulatory assessment data. For the ambulatory assessment part, all variables will be assessed 8 times a day for 7 consecutive days. For the multilevel analysis this would mean that there are 56 occasions of measurement nested within 159 individuals resulting in 8904 data points. For variable affective states it is reasonable to assume an intraclass correlation of 0.30 resulting in a design effect of  $DE = 21.7$



<sup>80</sup>. Therefore, our multilevel analysis would be approximately comparable to a classical multiple regression analysis with 410 individuals <sup>80</sup>. Given this sample size it would be possible to detect a small interaction effect between two independent variables (partial R<sup>2</sup> = 0.01) in a multiple regression analysis with a power of .8 (assuming  $\alpha=.05$ ).

## Data analysis

### 1. Affective dynamics

To assess whether groups differ in their affective dynamics (i.e., inertia, instability, variability), we will calculate three different within-person measures for both positive and negative affect <sup>81</sup>: (a) Affective variability will be assessed by the within-subject standard deviation of the respective affect scale. (b) Affective instability will be calculated as the within-subject root Mean Square Successive Difference (rMSSD) between consecutive affect measures. (c) Inertia will be assessed by the temporal dependency of consecutive affect measures, i.e., the within-subject lag-one autocorrelation. Autocorrelations will be Fisher's z transformed to normalize their distribution.

Based on the distribution of the respective indices, we will select adequate methods for testing group differences. We will further examine whether controlling for mean levels of positive or negative affect will have an impact on the main effect of Group <sup>82</sup>.

### 2./3. Group differences in the use and effectiveness of affect regulation strategies

To examine whether groups differ in the frequency of using rumination, suppression, or reappraisal, we will employ hierarchical linear modeling. The dependent variable will be the intensity rating of the respective AR strategy assessed at time t. The predictor variable of interest will be Group (BPD, MDD, CTL). In addition, we will enter the intensity rating of all other strategies to control for overall AR strategy use.

To examine whether the effectiveness of rumination, suppression, or reappraisal differs among groups, we will employ hierarchical linear modeling. The dependent variable will be the respective affect rating (positive or negative) at time  $t$ . Affect ratings at time  $t-1$  will be entered as predictor. Predictor variables of main interest will be Group (BPD, MDD, CTL) and the intensity of each assessed AR Strategy (reappraisal, rumination, suppression, distraction, acceptance, social sharing) employed between time  $t-1$  and time  $t$ .

#### 4. Group differences in cognitive control functions

Reaction time data from the behavioral experiments will be cleansed according to the following procedures: outliers in response latencies will be defined as values below or above the upper or lower fences of each individual's distribution in each experimental condition. Outliers will be eliminated. In addition, participants will be excluded from analyses if their overall accuracy level indicates that the task was not sufficiently understood.

In a first step, group differences in cognitive control functions will be analyzed using separate multi-level models per experiment. Response latency will be the dependent variable. The Experimental Condition, Stimuli Valence (where applicable), and Group will be entered as predictor variables.

In a second step, composite scores for the ability to discard irrelevant information from working memory, and for the ability to control interference from distracting information will be generated. Group differences on these composite scores will be examined by using multi-level models. The respective composite score will be the dependent variable. Stimuli Valence and Group will be entered as predictor variables.

#### 5. Relating cognitive control functions and affect regulation

a. To examine whether the *use* of rumination, suppression, or reappraisal will be related to individual differences in cognitive control functions, we will employ hierarchical linear

1  
2 modeling. The dependent variable will be the intensity rating of the AR strategies assessed at  
3 time t. The predictor variables of interest will be the specific Strategy (reappraisal,  
4 rumination, suppression, distraction, acceptance, social sharing), and the Cognitive Control  
5 scores, as detailed below.  
6  
7  
8  
9

10  
11 b. To examine whether the *effectiveness* of reappraisal, rumination, or suppression  
12 will be related to individual differences in cognitive control functions, we will also employ  
13 hierarchical linear modeling. The dependent variable will be the respective affect rating  
14 (positive or negative) at time t. Affect ratings at time t-1 will be entered as predictor variable  
15 (see 2./3.). Further predictor variables of interest will be Group (BPD, MDD, CTL), the  
16 Cognitive Control scores (see below), and the Intensity of each assessed AR strategy  
17 (reappraisal, rumination, suppression, distraction, acceptance, social sharing) employed  
18 between time t-1 and time t.  
19  
20  
21  
22  
23  
24  
25  
26  
27

28  
29 Cognitive control indices for each experiment will be computed as follows: For the  
30 'Working Memory Selection Task', the discarding index will be computed as the median  
31 response latency to suppress probes minus the median response latency to novel probes of the  
32 same valence. Two separate difference scores, one for each valence condition (positive,  
33 negative), will be computed.  
34  
35  
36  
37  
38

39  
40 For the Removal and Updating task, the removal index will be assessed as the  
41 difference in response latencies between trials with short and long CTIs. This difference will  
42 be computed as a proportional gain score accounting for general processing speed (i.e.,  
43 Removal Speed = [mean(short CTI) – mean(long CTI)] / mean(short CTI)). We will calculate  
44 two separate removal time indices for the removal of negative and positive words,  
45 respectively.  
46  
47  
48  
49  
50  
51

52  
53 For the Stroop Task, the classical behavioral interference effect (i.e. response latencies  
54 to incongruent trials minus response latencies to congruent trials) will be computed.  
55  
56  
57  
58  
59  
60

1  
2  
3 In the 'Delayed Working Memory Task', a general distraction score will be computed  
4 by subtracting response latencies in trials with blank screens presented in the delay period  
5 from response latencies in trials with neutral and negative IAPS stimuli presented in the delay  
6 period. In addition, we will calculate an 'affective distraction score' by subtracting response  
7 latencies for neutral stimuli from response latencies for negative stimuli.  
8  
9  
10  
11  
12

### 13 14 15 **Patients and public involvement**

16  
17 There was no further involvement of patients or the public in the development of this study  
18 protocol. The results of this study will be forwarded to interested participants. Results will be  
19 disseminated to relevant psychotherapeutic and patient communities in peer-reviewed  
20 journals, and at scientific conferences.  
21  
22  
23  
24  
25  
26  
27

### 28 29 **Ethics and dissemination**

30  
31 The study has been approved by the Ethics Board at Freie Universität Berlin, Germany (No.:  
32 67/2013; Amendment: 136/2017) and will be conducted in accordance with the Helsinki  
33 Declaration. The research team members have made sure that the study respects the following  
34 ethical principles: all the personal data gathered will be treated confidentially, written  
35 informed consent will be collected, data will be securely stored, and the data will only be used  
36 for research purposes. Participation in this research study is voluntary. Participants will be  
37 reminded of their rights to withdraw from the study without giving any reason. Data privacy  
38 will be guaranteed: all the research data gathered during the project will be identified using  
39 pseudonyms. Personal data will be kept under lock and is stored separately from research  
40 data. Communications and publications will not enable identification of individual  
41 participants. Ambulatory assessment will be realized with a smartphone application  
42 (movisensXS) on devices provided by the research team. No further information of the  
43 participants' behavior (e.g., GPS-tracking of movement profiles) is stored.  
44  
45  
46  
47  
48  
49  
50  
51  
52  
53  
54  
55  
56  
57  
58  
59  
60

1  
2  
3  
4  
5  
6  
7  
8  
9  
10  
11  
12  
13  
14  
15  
16  
17  
18  
19  
20  
21  
22  
23  
24  
25  
26  
27  
28  
29  
30  
31  
32  
33  
34  
35  
36  
37  
38  
39  
40  
41  
42  
43  
44  
45  
46  
47  
48  
49  
50  
51  
52  
53  
54  
55  
56  
57  
58  
59  
60

We plan to publish several articles in peer-reviewed scientific journals. In addition, we will communicate the results at scientific congresses. This research project will also result in a PhD thesis.

For peer review only

**References**

1. Linehan MM, Bohus M, Lynch TR. Dialectical Behavior Therapy for Pervasive Emotion Dysregulation: Theoretical and Practical Underpinnings. In: Gross JJ, ed. *Handbook of emotion regulation*. New York, NY US: Guilford Press 2007:581-605.
2. Nolen-Hoeksema S, Wisco BE, Lyubomirsky S. Rethinking rumination. *Perspectives on Psychological Science* 2008;3(5):400-24. doi: 10.1111/j.1745-6924.2008.00088.x
3. Joormann J, D'Avanzato C. Emotion regulation in depression: Examining the role of cognitive processes. *Cognition and Emotion* 2010;24(6):913-39. doi: 10.1080/02699931003784939
4. Ochsner KN, Gross JJ. The cognitive control of emotion. *Trends Cogn Sci* 2005;9(5):242-49. doi: DOI 10.1016/j.tics.2005.03.010
5. Koval P, Kuppens P, Allen NB, et al. Getting stuck in depression: The roles of rumination and emotional inertia. *Cognition and Emotion* 2012;26(8):1412-27. doi: 10.1080/02699931.2012.667392
6. Bylsma LM, Morris BH, Rottenberg J. A meta-analysis of emotional reactivity in major depressive disorder. *Clinical psychology review* 2008;28(4):676-91.
7. Aldao A, Nolen-Hoeksema S, Schweizer S. Emotion-regulation strategies across psychopathology: A meta-analytic review. *Clinical Psychology Review* 2010;30(2):217-37. doi: 10.1016/j.cpr.2009.11.004
8. Nolen-Hoeksema S, Morrow J. A prospective study of depression and posttraumatic stress symptoms after a natural disaster: the 1989 Loma Prieta Earthquake. *Journal of Personality and Social Psychology* 1991;61(1):115.
9. Watkins ER. Constructive and unconstructive repetitive thought. *Psychol Bull* 2008;134(2):163-206. doi: 10.1037/0033-2909.134.2.163

- 1  
2  
3 10. Ehring T, Tuschen-Caffier B, Schnülle J, et al. Emotion regulation and vulnerability to  
4 depression: Spontaneous versus instructed use of emotion suppression and reappraisal.  
5  
6 *Emotion* 2010;10(4):563-72. doi: 10.1037/a0019010  
7  
8
- 9 11. Quigley L, Dobson KS. An examination of trait, spontaneous and instructed emotion  
10 regulation in dysphoria. *Cognition and Emotion* 2014;28(4):622-35. doi:  
11  
12 10.1080/02699931.2013.848786  
13  
14
- 15 12. D'Avanzato C, Joormann J, Siemer M, et al. Emotion regulation in depression and  
16 anxiety: Examining diagnostic specificity and stability of strategy use. *Cognitive*  
17  
18 *Therapy and Research* 2013 doi: 10.1007/s10608-013-9537-0  
19  
20
- 21 13. Gross JJ, John OP. Individual differences in two emotion regulation processes:  
22 implications for affect, relationships, and well-being. *Journal of Personality and*  
23  
24 *Social Psychology* 2003;85(2):348.  
25  
26  
27
- 28 14. McRae K, Jacobs SE, Ray RD, et al. Individual differences in reappraisal ability: Links to  
29 reappraisal frequency, well-being, and cognitive control. *Journal of Research in*  
30  
31 *Personality* 2012;46(1):2-7.  
32  
33  
34
- 35 15. Pe ML, Raes F, Koval P, et al. Interference resolution moderates the impact of rumination  
36 and reappraisal on affective experiences in daily life. *Cognition and Emotion*  
37  
38 2013;27(3):492-501. doi: 10.1080/02699931.2012.719489  
39  
40
- 41 16. Joormann J, Siemer M, Gotlib IH. Mood regulation in depression: Differential effects of  
42 distraction and recall of happy memories on sad mood. *Journal of Abnormal*  
43  
44 *Psychology* 2007;116(3):484-90. doi: 10.1037/0021-843x.116.3.484  
45  
46  
47
- 48 17. Troy AS, Wilhelm FH, Shallcross AJ, et al. Seeing the silver lining: Cognitive reappraisal  
49 ability moderates the relationship between stress and depressive symptoms. *Emotion*  
50  
51 2010;10(6):783-95. doi: 10.1037/a0020262  
52  
53  
54  
55  
56  
57  
58  
59  
60

- 1  
2  
3 18. Stiglmayr C, Grathwol T, Linehan MM, et al. Aversive tension in patients with borderline  
4  
5 personality disorder: a computer-based controlled field study. *Acta psychiatrica*  
6  
7 *Scandinavica* 2005;111(5):372-9.  
8
- 9 19. Ebner-Priemer U, Kuo J, Kleindienst N, et al. State affective instability in borderline  
10  
11 personality disorder assessed by ambulatory monitoring. *Psychological Medicine*  
12  
13 2007;37(07):961-70.  
14
- 15 20. Schulze L, Domes G, Kruger A, et al. Neuronal correlates of cognitive reappraisal in  
16  
17 borderline patients with affective instability. *Biological Psychiatry* 2011;69(6):564-73.  
18  
19 doi: S0006-3223(10)01156-X [pii]  
20  
21 10.1016/j.biopsycho.2010.10.025 [published Online First: 2011/01/05]  
22  
23
- 24 21. Schulze L, Schmahl C, Niedtfeld I. Neural correlates of disturbed emotion processing in  
25  
26 borderline personality disorder: a multimodal meta-analysis. *Biological Psychiatry*  
27  
28 2016;79(2):97-106.  
29
- 30 22. Beblo T, Fernando S, Kamper P, et al. Increased attempts to suppress negative and  
31  
32 positive emotions in Borderline Personality Disorder. *Psychiatry Res* 2013 doi:  
33  
34 10.1016/j.psychres.2013.06.036 [published Online First: 2013/07/23]  
35  
36
- 37 23. Chapman AL, Specht MW, Cellucci T. Borderline personality disorder and deliberate  
38  
39 self-harm: Does experiential avoidance play a role? *Suicide Life-Threat*  
40  
41 2005;35(4):388-99. doi: DOI 10.1521/suli.2005.35.4.388  
42  
43
- 44 24. Abela JRZ, Payne AVL, Moussaly N. Cognitive Vulnerability to Depression in  
45  
46 Individuals With Borderline Personality Disorder. *Journal of Personality Disorders*  
47  
48 2003;17(4):319-29. doi: 10.1521/pedi.17.4.319.23968  
49
- 50 25. Baer RA, Sauer SE. Relationships Between Depressive Rumination, Anger Rumination,  
51  
52 and Borderline Personality Features. *Personality Disorders: Theory, Research, and*  
53  
54 *Treatment* 2011;2(2):142-50. doi: 10.1037/a0019478  
55  
56  
57  
58  
59  
60



- 1  
2  
3 26. Chapman AL, Dixon-Gordon KL, Waiters K, N. Borderline personality features moderate  
4  
5 emotion reactivity and emotion regulation in response to a fear stressor. *Journal of*  
6  
7 *Experimental Psychopathology* 2013:1-20.  
8
- 9 27. Chapman AL, Rosenthal MZ, Leung DW. Emotion suppression in borderline personality  
10  
11 disorder: An experience sampling study. *Journal of Personality Disorders*  
12  
13 2009;23(1):29-47.  
14
- 15 28. Svaldi J, Dorn C, Matthies S, et al. Effects of suppression and acceptance of sadness on  
16  
17 the urge for non-suicidal self-injury and self-punishment. *Psychiatry Res* 2012;200(2-  
18  
19 3):404-16. doi: 10.1016/j.psychres.2012.06.030 [published Online First: 2012/07/24]  
20  
21
- 22 29. Koenigsberg HW, Fan J, Ochsner KN, et al. Neural correlates of the use of psychological  
23  
24 distancing to regulate responses to negative social cues: a study of patients with  
25  
26 borderline personality disorder. *Biological Psychiatry* 2009;66(9):854-63. doi: S0006-  
27  
28 3223(09)00763-X [pii]  
29  
30 10.1016/j.biopsycho.2009.06.010 [published Online First: 2009/08/05]  
31  
32
- 33 30. Lang S, Kotchoubey B, Frick C, et al. Cognitive reappraisal in trauma-exposed women  
34  
35 with borderline personality disorder. *Neuroimage* 2012;59(2):1727-34. doi: S1053-  
36  
37 8119(11)00978-5 [pii]  
38  
39 10.1016/j.neuroimage.2011.08.061 [published Online First: 2011/09/13]  
40  
41
- 42 31. Friedman NP, Miyake A. The relations among inhibition and interference control  
43  
44 functions: A latent-variable analysis. *J Exp Psychol Gen* 2004;133(1):101-35. doi: Doi  
45  
46 10.1037/0096-3445.133.1.101  
47
- 48 32. Miyake A, Friedman NP. The nature and organization of individual differences in  
49  
50 executive functions four general conclusions. *Current directions in psychological*  
51  
52 *science* 2012;21(1):8-14.  
53  
54  
55  
56  
57  
58  
59

- 1  
2  
3 33. Domes G, Winter B, Schnell K, et al. The influence of emotions on inhibitory functioning  
4  
5 in borderline personality disorder. *Psychological Medicine* 2006;36(8):1163-72. doi:  
6  
7 S0033291706007756 [pii]  
8  
9 10.1017/S0033291706007756 [published Online First: 2006/05/17]  
10  
11 34. Krause-Utz A, Oei NYL, Niedtfeld I, et al. Influence of emotional distraction on working  
12  
13 memory performance in borderline personality disorder. *Psychological Medicine*  
14  
15 2012;42(10):2181-92. doi: Doi 10.1017/S0033291712000153  
16  
17 35. Prehn K, Schulze L, Rossmann S, et al. Effects of emotional stimuli on working memory  
18  
19 processes in male criminal offenders with borderline and antisocial personality  
20  
21 disorder. *World J Biol Psychia* 2013;14(1):71-78. doi: Doi  
22  
23 10.3109/15622975.2011.584906  
24  
25 36. Wingenfeld K, Mensebach C, Rullkoetter N, et al. Attentional Bias to Personally Relevant  
26  
27 Words in Borderline Personality Disorder Is Strongly Related to Comorbid  
28  
29 Posttraumatic Stress Disorder. *Journal of Personality Disorders* 2009;23(2):141-55.  
30  
31 37. Goeleven E, De Raedt R, Baert S, et al. Deficient inhibition of emotional information in  
32  
33 depression. *Journal of Affective Disorders* 2006;93(1-3):149-57. doi:  
34  
35 10.1016/j.jad.2006.03.007  
36  
37 38. Joormann J, Gotlib IH. Updating the contents of working memory in depression:  
38  
39 Interference from irrelevant negative material. *Journal of Abnormal Psychology*  
40  
41 2008;117(1):182-92. doi: 10.1037/0021-843x.117.1.182  
42  
43 39. Joormann J, Levens SM, Gotlib IH. Sticky thoughts: Depression and rumination are  
44  
45 associated with difficulties manipulating emotional material in working memory.  
46  
47 *Psychological Science* 2011;22(8):979-83. doi: 10.1177/0956797611415539  
48  
49 40. Lau MA, Christensen BK, Hawley LL, et al. Inhibitory deficits for negative information in  
50  
51 persons with major depressive disorder. *Psychological Medicine* 2007;37(9):1249-59.  
52  
53 doi: 10.1017/s0033291707000530  
54  
55  
56  
57  
58  
59  
60

- 1  
2  
3 41. Zetsche U, D'Avanzato C, Joormann J. Depression and rumination: Relation to  
4  
5 components of inhibition. *Cognition and Emotion* 2012;26(4):758-67. doi:  
6  
7 10.1080/02699931.2011.613919  
8  
9 42. Joormann J, Gotlib IH. Emotion regulation in depression: Relation to cognitive inhibition.  
10  
11 *Cognition and Emotion* 2010;24(2):281-98. doi: 10.1080/02699930903407948  
12  
13 43. Gul A, Ahmad H. Cognitive deficits and emotion regulation strategies in patients with  
14  
15 psychogenic nonepileptic seizures: A task-switching study. *Epilepsy & Behavior*  
16  
17 2014;32:108-13. doi: 10.1016/j.yebeh.2014.01.015  
18  
19 44. Pe ML, Raes F, Kuppens P. The cognitive building blocks of emotion regulation: Ability  
20  
21 to update working memory moderates the efficacy of rumination and reappraisal on  
22  
23 emotion. *PLoS ONE* 2013;8(7) doi: 10.1371/journal.pone.0069071  
24  
25 45. Baer RA, Peters JR, Eisenlohr-Moul TA, et al. Emotion-related cognitive processes in  
26  
27 borderline personality disorder: A review of the empirical literature. *Clinical*  
28  
29 *Psychology Review* 2012;32(5):359-69. doi:  
30  
31 <http://dx.doi.org/10.1016/j.cpr.2012.03.002>  
32  
33  
34 46. Donaldson C, Lam D. Rumination, mood and social problem-solving in major depression.  
35  
36 *Psychological Medicine* 2004;34(07):1309-18.  
37  
38 47. Epp AM, Dobson KS, Dozois DJ, et al. A systematic meta-analysis of the Stroop task in  
39  
40 depression. *Clinical Psychology Review* 2012;32(4):316-28.  
41  
42  
43 48. Thayer JF, Lane RD. A model of neurovisceral integration in emotion regulation and  
44  
45 dysregulation. *Journal of Affective Disorders* 2000;61(3):201-16. doi:  
46  
47 [https://doi.org/10.1016/S0165-0327\(00\)00338-4](https://doi.org/10.1016/S0165-0327(00)00338-4)  
48  
49 49. Williams DP, Cash C, Rankin C, et al. Resting heart rate variability predicts self-reported  
50  
51 difficulties in emotion regulation: a focus on different facets of emotion regulation.  
52  
53 *Frontiers in psychology* 2015;6:261.  
54  
55  
56  
57  
58  
59  
60

- 1  
2  
3 50. Koval P, Ogrinz B, Kuppens P, et al. Affective instability in daily life is predicted by  
4  
5 resting heart rate variability. *PloS one* 2013;8(11):e81536.  
6  
7 51. Kemp AH, Quintana DS, Gray MA, et al. Impact of depression and antidepressant  
8  
9 treatment on heart rate variability: a review and meta-analysis. *Biological psychiatry*  
10  
11 2010;67(11):1067-74.  
12  
13 52. Koenig J, Kemp AH, Feeling NR, et al. Resting state vagal tone in borderline personality  
14  
15 disorder: a meta-analysis. *Progress in Neuro-Psychopharmacology and Biological*  
16  
17 *Psychiatry* 2016;64:18-26.  
18  
19 53. Reed J, Buck S. The effect of regular aerobic exercise on positive-activated affect: A  
20  
21 meta-analysis. *Psychology of Sport and Exercise* 2009;10(6):581-94.  
22  
23 54. Kanning MK, Ebner-Priemer UW, Schlicht WM. How to investigate within-subject  
24  
25 associations between physical activity and momentary affective states in everyday life:  
26  
27 a position statement based on a literature overview. *Frontiers in psychology*  
28  
29 2013;4:187.  
30  
31 55. Wenze SJ, Gunthert KC, German RE. Biases in affective forecasting and recall in  
32  
33 individuals with depression and anxiety symptoms. *Personality and Social Psychology*  
34  
35 *Bulletin* 2012;38(7):895-906.  
36  
37 56. Loewenstein G. Affect regulation and affective forecasting. *Handbook of emotion*  
38  
39 *regulation* 2007:180-203.  
40  
41 57. Levine LJ, Schmidt S, Kang HS, et al. Remembering the silver lining: Reappraisal and  
42  
43 positive bias in memory for emotion. *Cognition & emotion* 2012;26(5):871-84.  
44  
45 58. Wittchen H-U, Wunderlich U, Gruschwitz S, et al. SKID-I - Strukturiertes Klinisches  
46  
47 Interview für DSM-IV. Achse I: Psychische Störungen. Interviewheft. Göttingen:  
48  
49 Hogrefe 1997.  
50  
51 59. Fydrich T, Renneberg B, Schmitz B, et al. SKID-II: strukturiertes klinisches Interview für  
52  
53 DMS-IV; Achse II: Persönlichkeitsstörungen; Interviewheft; eine deutschsprachige,  
54  
55  
56  
57  
58  
59  
60

- 1  
2  
3 erw. Bearb. der amer. Originalversion des SKID-II von: Michael B. First et al.  
4  
5 Göttingen: Hogrefe 1997.  
6  
7 60. Beck AT, Steer RA, Brown GK. Manual for the Beck Depression Inventory-II. San  
8  
9 Antonio, TX: Psychological Corporation 1996.  
10  
11 61. Kühner C, Bürger C, Keller F, et al. Reliabilität und Validität des revidierten Beck-  
12  
13 Depressionsinventars (BDI-II). *Nervenarzt* 2007;78(6):651-56. doi: 10.1007/s00115-  
14  
15 006-2098-7  
16  
17 62. Bohus M, Kleindienst N, Limberger MF, et al. The Short Version of the Borderline  
18  
19 Symptom List (BSL-23): Development and Initial Data on Psychometric Properties.  
20  
21 *Psychopathology* 2009;42(1):32-39.  
22  
23 63. Derogatis LR. SCL-90-R. *Administration, scoring and procedures Manual-II (2nd ed)*  
24  
25 *Baltimore: Clinical Psychometric Research* 1983  
26  
27 64. Geisheim C, Hahlweg K, Fiegenbaum W, et al. Das Brief Symptom Inventory (BSI) als  
28  
29 Instrument zur Qualitätssicherung in der Psychotherapie. *Diagnostica* 2002;48(1):28-  
30  
31 36. doi: 10.1026//0012-1924.48.1.28  
32  
33 65. Huffziger S, Kühner C. Die Ruminationsfacetten Brooding und Reflection. *Zeitschrift für*  
34  
35 *klinische Psychologie und Psychotherapie* 2012  
36  
37 66. Watson D, Clark LA, Tellegen A. Development and validation of brief measures of  
38  
39 positive and negative affect: The PANAS scales. *Journal of Personality and Social*  
40  
41 *Psychology* 1988;54(6):1063-70. doi: 10.1037/0022-3514.54.6.1063  
42  
43 67. Stiglmayr C, Schmahl C, Bremner JD, et al. Development and psychometric  
44  
45 characteristics of the DSS-4 as a short instrument to assess dissociative experience  
46  
47 during neuropsychological experiments. *Psychopathology* 2009;42(6):370-4. doi:  
48  
49 10.1159/000236908 [published Online First: 2009/09/16]  
50  
51 68. Heij JE, Cheavens JS. Back to basics: A naturalistic assessment of the experience and  
52  
53 regulation of emotion. *Emotion* 2014;14(5):878-91. doi: 10.1037/a0037231  
54  
55  
56  
57  
58  
59

- 1  
2  
3 69. Zhang JX, Leung HC, Johnson MK. Frontal activations associated with accessing and  
4  
5 evaluating information in working memory: an fMRI study. *Neuroimage*  
6  
7 2003;20(3):1531-39. doi: 10.1016/j.neuroimage.2003.07.016  
8
- 9 70. Võ ML, Conrad M, Kuchinke L, et al. The Berlin affective word list reloaded (BAWL-R).  
10  
11 *Behavior research methods* 2009;41(2):534-38.  
12
- 13 71. Ecker UK, Lewandowsky S, Oberauer K. Removal of information from working memory:  
14  
15 A specific updating process. *Journal of Memory and Language* 2014;74:77-90.  
16
- 17 72. Chang EP, Ecker UK, Page AC. Impaired memory updating associated with impaired  
18  
19 recall of negative words in dysphoric rumination—Evidence for a removal deficit.  
20  
21 *Behaviour Research and Therapy* 2017;93:22-28.  
22
- 23 73. Oei NYL, Tollenaar MS, Spinhoven P, et al. Hydrocortisone reduces emotional distracter  
24  
25 interference in working memory. *Psychoneuroendocrinology* 2009;34(9):1284-93.  
26  
27 doi: <http://dx.doi.org/10.1016/j.psyneuen.2009.03.015>  
28  
29
- 30 74. Lang PJ, Bradley MM, Cuthbert BN. International affective picture system (IAPS):  
31  
32 Affective ratings of pictures and instruction manual. Gainesville, FL: University of  
33  
34 Florida, 2008.  
35  
36
- 37 75. Etkin A, Egner T, Peraza DM, et al. Resolving emotional conflict: a role for the rostral  
38  
39 anterior cingulate cortex in modulating activity in the amygdala. *Neuron*  
40  
41 2006;51(6):871-82.  
42  
43
- 44 76. Etkin A, Prater KE, Hoeft F, et al. Failure of anterior cingulate activation and connectivity  
45  
46 with the amygdala during implicit regulation of emotional processing in generalized  
47  
48 anxiety disorder. *American Journal of Psychiatry* 2010;167(5):545-54.  
49
- 50 77. Ekman P. Pictures of facial affect. *Consulting Psychologists Press* 1976  
51
- 52 78. Horn W. L-P-S Leistungsprüfsystem. Göttingen: Hogrefe 1983.  
53  
54  
55  
56  
57  
58  
59  
60

- 1  
2  
3 79. Hey S, Anastasopoulou P, von Haaren B. Erfassung körperlicher Aktivität mittels  
4  
5 Akzelerometrie–Möglichkeiten und Grenzen aus technischer Sicht. *B&G*  
6  
7 *Bewegungstherapie und Gesundheitssport* 2014;30(02):73-78.  
8  
9 80. Eid M, Gollwitzer M, Schmitt M. Statistik und Forschungsmethoden Weinheim: Beltz  
10  
11 PVU 2013.  
12  
13 81. Koval P, Pe ML, Meers K, et al. Affect dynamics in relation to depressive symptoms:  
14  
15 Variable, unstable or inert? *Emotion* 2013;13(6):1132.  
16  
17 82. Ebner-Priemer U, Eid M, Kleindienst N, et al. Analytic strategies for understanding  
18  
19 affective (in) stability and other dynamic processes in psychopathology. *Journal of*  
20  
21 *Abnormal Psychology* 2009;118(1):195.  
22  
23  
24  
25  
26  
27  
28  
29  
30  
31  
32  
33  
34  
35  
36  
37  
38  
39  
40  
41  
42  
43  
44  
45  
46  
47  
48  
49  
50  
51  
52  
53  
54  
55  
56  
57  
58  
59  
60

**Figures**

*Figure 1.* Procedure of the research project

For peer review only



## Acknowledgements

### Funding

Funding for this study was provided by grants from the German Research Foundation (DFG-ZE 1029/2-1 to UZ and DFG-SCHU 2961/2-1 to LS).

### Conflict of Interests

All authors declare that there are no conflicts of interest.

### Contributorship Statement

Lars Schulze and Ulrike Zetsche designed the study, wrote the funding grant, and drafted and revised the current manuscript. Paul Christian Bürkner was responsible for the data analytic plan, wrote the section data analysis, and revised the current manuscript. Julian Bohländer piloted the Removal and Updating task, coordinates the data assessment, and wrote and revised the current manuscript.

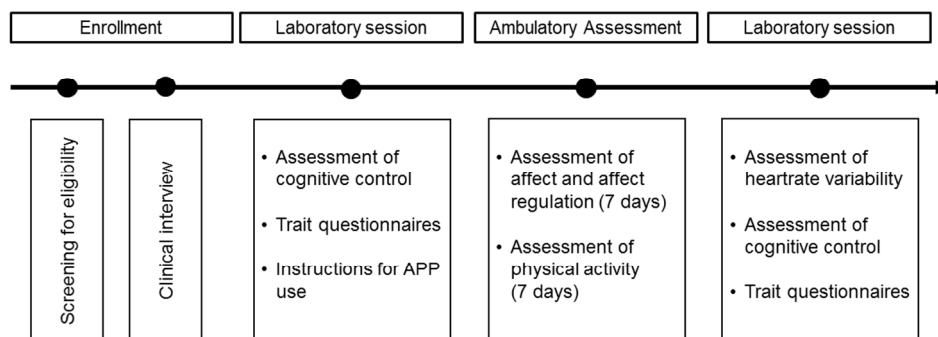

Figure 1. Procedure of the research project

108x60mm (300 x 300 DPI)

Review only
